# Supplementary material for: Sequential Dieckmann cyclization enables the total synthesis of 7-epi-clusianone and 18-hydroxy-7-epi-clusianone
Source: Royal Society of Chemistry journal article supplement (doi:10.1039/d3ob01840g), 2023-12-13

# Sequential Dieckmann Cyclization Enables the Total Synthesis of 7-*epi*-Clusianone, 18-Hydroxy-7-*epi*-clusianone

*Yunhui Wan*<sup>#</sup>, *Huaimo Wu*<sup>#</sup>, *Linhao Xia*, *Song Liu*, *Yi Ren*, *Hongxi Xu*, \* *Changwu*

*Zheng*<sup>\*</sup>

School of Pharmacy, Shanghai University of Traditional Chinese Medicine, Shanghai

201203, People's Republic of China

## Content

|                                                                                   |   |
|-----------------------------------------------------------------------------------|---|
| 1. Comparative data for natural product 7- <i>epi</i> -clusianone.....            | 2 |
| 2. Comparative data for natural product 18-hydroxy-7- <i>epi</i> -clusianone..... | 3 |
| 3. <sup>1</sup> H NMR and <sup>13</sup> C NMR Spectrum for all the compounds..... | 6 |

## 1. Comparative data for natural product *7-epi-clusianone*

| Position | <i>7-epi-clusianone</i> (a) isolated |                                        | <i>7-epi-clusianone</i> (a) synthetic |                                        |
|----------|--------------------------------------|----------------------------------------|---------------------------------------|----------------------------------------|
|          | $\delta$ C (125 MHz)                 | $\delta$ H (500 MHz)                   | $\delta$ C (151 MHz)                  | $\delta$ H (600 MHz)                   |
| 1        | 68.6                                 |                                        | 68.8                                  |                                        |
| 2        | 193.7                                |                                        | 193.8                                 |                                        |
| 3        | 115.9                                |                                        | 116.0                                 |                                        |
| 4        | 196.6                                |                                        | 196.9                                 |                                        |
| 5        | 58.4                                 |                                        | 58.5                                  |                                        |
| 6ax      | 39.0                                 | 2.22 (dd) (14.4, 7.0)                  | 39.1                                  | 2.22 (m)                               |
| 6eq      |                                      | 2.26 (dd) (14.4, 1.8)                  |                                       | 2.26 (m)                               |
| 7        | 46.3                                 | 1.44 (overlapped)                      | 46.4                                  | 1.44 (overlapped)                      |
| 8        | 48.3                                 |                                        | 48.5                                  |                                        |
| 9        | 208.1                                |                                        | 208.0                                 |                                        |
| 10       | 26.2                                 | 2.47 (m)                               | 26.5                                  | 2.47 (m)                               |
| 11       | 120.1                                | 5.12 (m)                               | 119.9                                 | 5.13 (m)                               |
| 12       | 134.8                                |                                        | 135.0                                 |                                        |
| 13       | 18.1                                 | 1.70 (s)                               | 18.1                                  | 1.71 (s)                               |
| 14       | 26.0                                 | 1.66 (s)                               | 26.1                                  | 1.67 (s)                               |
| 15       | 197.5                                |                                        | 197.7                                 |                                        |
| 16       | 136.8                                |                                        | 136.9                                 |                                        |
| 17 21    | 129.0                                | 7.52 (d, 7.6)                          | 129.1                                 | 7.52 (m)                               |
| 18 20    | 127.8                                | 7.38 (t, 7.6)                          | 128.0                                 | 7.37 (t, 7.6)                          |
| 19       | 132.6                                | 7.53 (t, 7.6)                          | 132.8                                 | 7.52 (m)                               |
| 22       | 30.5                                 | 2.62 (m)                               | 30.5                                  | 2.62 (m)                               |
| 23       | 118.9                                | 5.15 (m)                               | 119.0                                 | 5.13 (m)                               |
| 24       | 134.7                                |                                        | 134.9                                 |                                        |
| 25       | 18.1                                 | 1.67 (s)                               | 18.1                                  | 1.65 (s)                               |
| 26       | 26.0                                 | 1.80 (s)                               | 26.0                                  | 1.80 (s)                               |
| 27       | 28.9                                 | 2.05 (overlapped)<br>2.16 (overlapped) | 28.9                                  | 2.05 (overlapped)<br>2.16 (overlapped) |
| 28       | 123.5                                | 4.85 (m)                               | 123.4                                 | 4.88 (m)                               |
| 29       | 132.9                                |                                        | 133.0                                 |                                        |
| 30       | 17.7                                 | 1.43 (s)                               | 17.8                                  | 1.45 (s)                               |
| 31       | 25.7                                 | 1.58 (s)                               | 25.8                                  | 1.58 (s)                               |
| 32       | 27.0                                 | 0.97 (s)                               | 27.0                                  | 0.98 (s)                               |
| 33       | 22.5                                 | 1.13 (s)                               | 22.5                                  | 1.14 (s)                               |

| Position | <i>7-epi-clusianone</i> (b) isolated |                      | <i>7-epi-clusianone</i> (b) synthetic |                      |
|----------|--------------------------------------|----------------------|---------------------------------------|----------------------|
|          | $\delta$ C (125 MHz)                 | $\delta$ H (500 MHz) | $\delta$ C (151 MHz)                  | $\delta$ H (600 MHz) |
| 1        | 65.5                                 |                      | 65.5                                  |                      |

|       |       |                       |       |                      |
|-------|-------|-----------------------|-------|----------------------|
| 2     | 196.7 |                       | 196.9 |                      |
| 3     | 115.5 |                       | 115.8 |                      |
| 4     | 193.6 |                       | 193.7 |                      |
| 5     | 63.2  |                       | 63.2  |                      |
| 6ax   | 40.3  | 2.01 (dd) (14.4, 7.0) | 40.5  | 2.01 (m)             |
| 6eq   |       | 2.11 (dd) (14.4, 2.8) |       | 2.11 (m)             |
| 7     | 46.6  | 1.44 (overlapped)     | 46.6  | 1.45 (m)             |
| 8     | 48.8  |                       | 48.9  |                      |
| 9     | 208.3 |                       | 208.2 |                      |
| 10    | 25.9  | 2.72 (m)              | 26.1  | 2.71 (m)             |
| 11    | 118.6 | 4.8 (m)               | 118.7 | 4.8 (m)              |
| 12    | 134.8 |                       | 135.0 |                      |
| 13    | 18.0  | 1.68 (s)              | 18.1  | 1.67 (s)             |
| 14    | 25.8  | 1.61 (s)              | 26.1  | 1.61 (s)             |
| 15    | 197.2 |                       | 197.4 |                      |
| 16    | 136.8 |                       | 136.9 |                      |
| 17 21 | 128.9 | 7.55 (d) (7.6)        | 129.1 | 7.55 (m)             |
| 18 20 | 127.8 | 7.40 (t) (7.6)        | 128.0 | 7.37 (t) (7.6)       |
| 19    | 132.6 | 7.53 (t) (7.6)        | 132.8 | 7.53 (m)             |
| 22    | 30.7  | 2.44 (m)<br>2.52 (m)  | 30.7  | 2.44 (m)<br>2.53 (m) |
| 23    | 119.7 | 5.24 (m)              | 119.8 | 5.22 (m)             |
| 24    | 134.6 |                       | 134.9 |                      |
| 25    | 18.2  | 1.66 (s)              | 18.1  | 1.67 (s)             |
| 26    | 26.1  | 1.76 (s)              | 26.0  | 1.76 (s)             |
| 27    | 28.9  | 2.00 (overlapped)     | 28.9  | 2.00 (overlapped)    |
| 28    | 124.0 | 4.87 (m)              | 123.9 | 4.87 (m)             |
| 29    | 133.0 |                       | 133.0 |                      |
| 30    | 17.8  | 1.50 (s)              | 17.8  | 1.51 (s)             |
| 31    | 25.7  | 1.64 (s)              | 25.8  | 1.64 (s)             |
| 32    | 26.9  | 1.06 (s)              | 26.9  | 1.06 (s)             |
| 33    | 22.8  | 1.30 (s)              | 22.8  | 1.30 (s)             |

## 2. Comparative data for natural product 18-hydroxy-7-*epi*-clusianone

| Position | 18-hydroxy-7- <i>epi</i> -clusianone (a)<br>isolated |                      | 18-hydroxy-7- <i>epi</i> -clusianone (a)<br>synthetic |                      |
|----------|------------------------------------------------------|----------------------|-------------------------------------------------------|----------------------|
|          | $\delta$ C (125 MHz)                                 | $\delta$ H (500 MHz) | $\delta$ C (151 MHz)                                  | $\delta$ H (600 MHz) |
| 1        | 68.7                                                 |                      | 68.7                                                  |                      |
| 2        | 194.6                                                |                      | 194.6                                                 |                      |
| 3        | 116.0                                                |                      | 116.0                                                 |                      |
| 4        | 197.7                                                | 17.63 (br s)         | 197.8                                                 |                      |

|    |       |                                  |       |                       |
|----|-------|----------------------------------|-------|-----------------------|
| 5  | 58.5  |                                  | 58.5  |                       |
| 6  | 39.1  | 2.27 (m)<br>2.21 (m)             | 39.1  | 2.27 (m)<br>2.21 (m)  |
| 7  | 46.4  | 1.45 (m)                         | 46.4  | 1.45 (m)              |
| 8  | 48.4  |                                  | 48.5  |                       |
| 9  | 207.9 |                                  | 208.0 |                       |
| 10 | 26.5  | 2.78 (m)                         | 26.5  | 2.77 (m)              |
| 11 | 119.8 | 5.08 (br d; 8)                   | 119.9 | 5.08 (br d)           |
| 12 | 135.0 |                                  | 135.0 |                       |
| 13 | 18.1  | 1.79 (s)                         | 18.1  | 1.78 (s)              |
| 14 | 26.1  | 1.68 (s)                         | 26.1  | 1.68 (s)              |
| 15 | 196.6 |                                  | 196.7 |                       |
| 16 | 137.9 |                                  | 137.9 |                       |
| 17 | 115.6 | 6.95 (br s)                      | 115.6 | 6.95 (br s)           |
| 18 | 155.7 |                                  | 115.7 |                       |
| 19 | 119.9 | 6.86 (m)                         | 119.9 | 6.87 (m)              |
| 20 | 128.7 | 7.14(m; W½ 17.5)                 | 128.7 | 7.14 (m)              |
| 21 | 121.4 | 7.00 (d; 7.5)                    | 121.4 | 7.00 (d)              |
| 22 | 30.5  | 2.62 (t; 8)<br>2.58 (dd;13.6, 9) | 30.5  | 2.61 (t)<br>2.58 (dd) |
| 23 | 118.4 | 5.14 (br t; 6.9)                 | 118.5 | 5.13 (br t)           |
| 24 | 134.8 |                                  | 134.9 |                       |
| 25 | 18.1  | 1.66 (s)                         | 18.1  | 1.65 (s)              |
| 26 | 26.0  | 1.58 (s)                         | 26.0  | 1.57 (s)              |
| 27 | 28.9  | 2.09 (m)<br>2.03 (m)             | 28.9  | 2.09 (m)<br>2.03 (m)  |
| 28 | 123.4 | 4.88 (m;W½ 15.6)                 | 123.4 | 4.88 (m)              |
| 29 | 133.0 |                                  | 133.0 |                       |
| 30 | 17.8  | 1.46 (s)                         | 17.8  | 1.45 (s)              |
| 31 | 25.8  | 1.62 (s)                         | 25.8  | 1.61 (s)              |
| 32 | 27.0  | 0.98 (s)                         | 27.0  | 0.98 (s)              |
| 33 | 22.5  | 1.16 (s)                         | 22.5  | 1.15 (s)              |

| Position | <b>18-hydroxy-7-<i>epi</i>-clusianone (b)</b><br>isolated |                      | <b>18-hydroxy-7-<i>epi</i>-clusianone (b)</b><br>synthetic |                      |
|----------|-----------------------------------------------------------|----------------------|------------------------------------------------------------|----------------------|
|          | $\delta$ C (125 MHz)                                      | $\delta$ H (500 MHz) | $\delta$ C (151 MHz)                                       | $\delta$ H (600 MHz) |
| 1        | 65.5                                                      |                      | 65.5                                                       |                      |
| 2        | 197.3                                                     | 17.72 (br s)         | 197.3                                                      |                      |
| 3        | 115.8                                                     |                      | 115.8                                                      |                      |
| 4        | 194.8                                                     |                      | 194.7                                                      |                      |
| 5        | 63.2                                                      |                      | 63.2                                                       |                      |
| 6        | 40.5                                                      | 2.05 (m)<br>2.17 (m) | 40.5                                                       | 2.05 (m)<br>2.17 (m) |



|    |       |                      |       |                      |
|----|-------|----------------------|-------|----------------------|
| 7  | 46.6  | 1.45 (m)             | 46.6  | 1.45 (m)             |
| 8  | 48.9  |                      | 48.9  |                      |
| 9  | 208.1 |                      | 208.2 |                      |
| 10 | 26.1  | 2.71 (m)<br>2.73 (m) | 26.1  | 2.71 (m)<br>2.73 (m) |
| 11 | 119.4 | 5.22 (br t; 6)       | 119.5 | 5.21 (t)             |
| 12 | 135.0 |                      | 135.0 |                      |
| 13 | 18.1  | 1.76 (s)             | 18.1  | 1.76 (s)             |
| 14 | 26.1  | 1.71 (s)             | 26.1  | 1.70 (s)             |
| 15 | 196.4 |                      | 196.5 |                      |
| 16 | 138.0 |                      | 138.0 |                      |
| 17 | 115.6 | 6.92 (br s)          | 115.6 | 6.92 (br s)          |
| 18 | 155.7 |                      | 155.7 |                      |
| 19 | 119.9 | 6.86 (m)             | 120.0 | 6.86 (m)             |
| 20 | 128.9 | 7.14 (m; W½ 17.5)    | 128.9 | 7.14 (m)             |
| 21 | 121.2 | 7.00 (d; 7.5)        | 121.2 | 7.00 (d)             |
| 22 | 30.7  | 2.55 (m)<br>2.46 (m) | 30.7  | 2.55 (m)<br>2.46 (m) |
| 23 | 118.8 | 4.79 (m; W½ 13.8)    | 118.8 | 4.78 (m)             |
| 24 | 134.8 |                      | 134.9 |                      |
| 25 | 18.2  | 1.71 (s)             | 18.1  | 1.70 (s)             |
| 26 | 26.0  | 1.58 (s)             | 26.0  | 1.57 (s)             |
| 27 | 29.0  | 2.21 (m)<br>1.89 (m) | 28.9  | 2.21 (m)<br>1.88 (m) |
| 28 | 123.9 | 4.88 (m; W½ 15.6)    | 123.9 | 4.87 (m)             |
| 29 | 133.0 |                      | 133.0 |                      |
| 30 | 17.8  | 1.52 (s)             | 17.8  | 1.51 (s)             |
| 31 | 26.0  | 1.69 (s)             | 26.0  | 1.70 (s)             |
| 32 | 26.9  | 1.06 (s)             | 26.9  | 1.06 (s)             |
| 33 | 22.8  | 1.31 (s)             | 22.8  | 1.30 (s)             |

### 3. $^1\text{H}$ NMR and $^{13}\text{C}$ NMR Spectrum for all the compounds

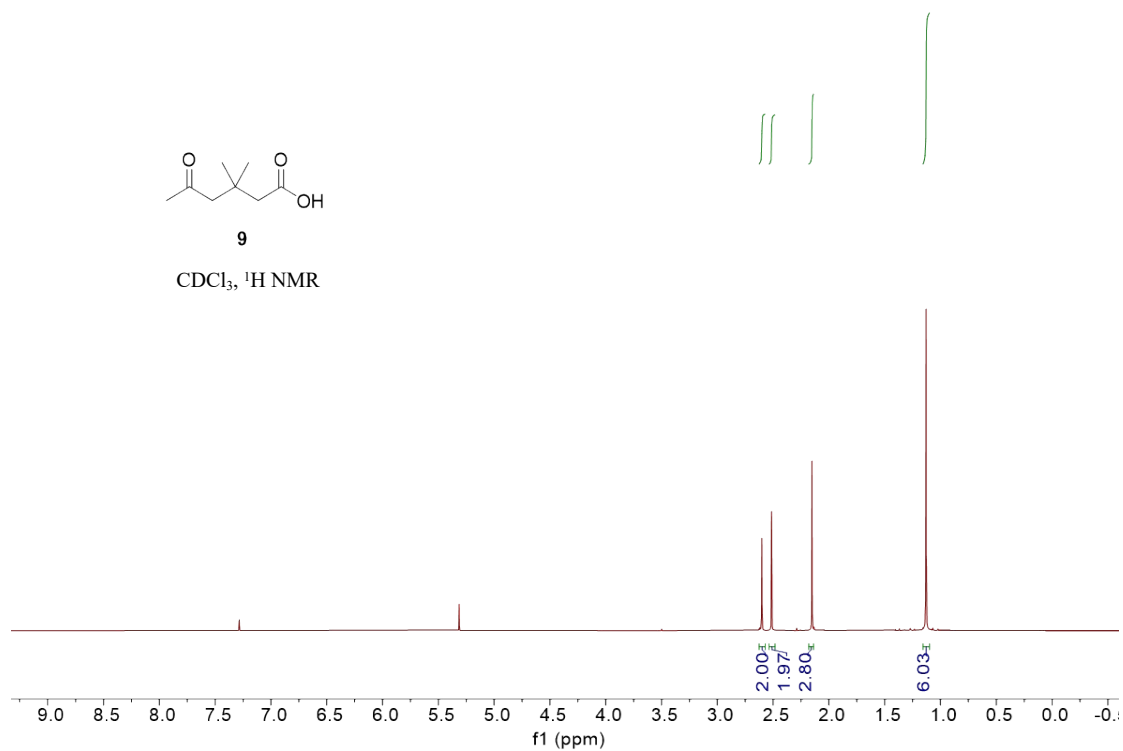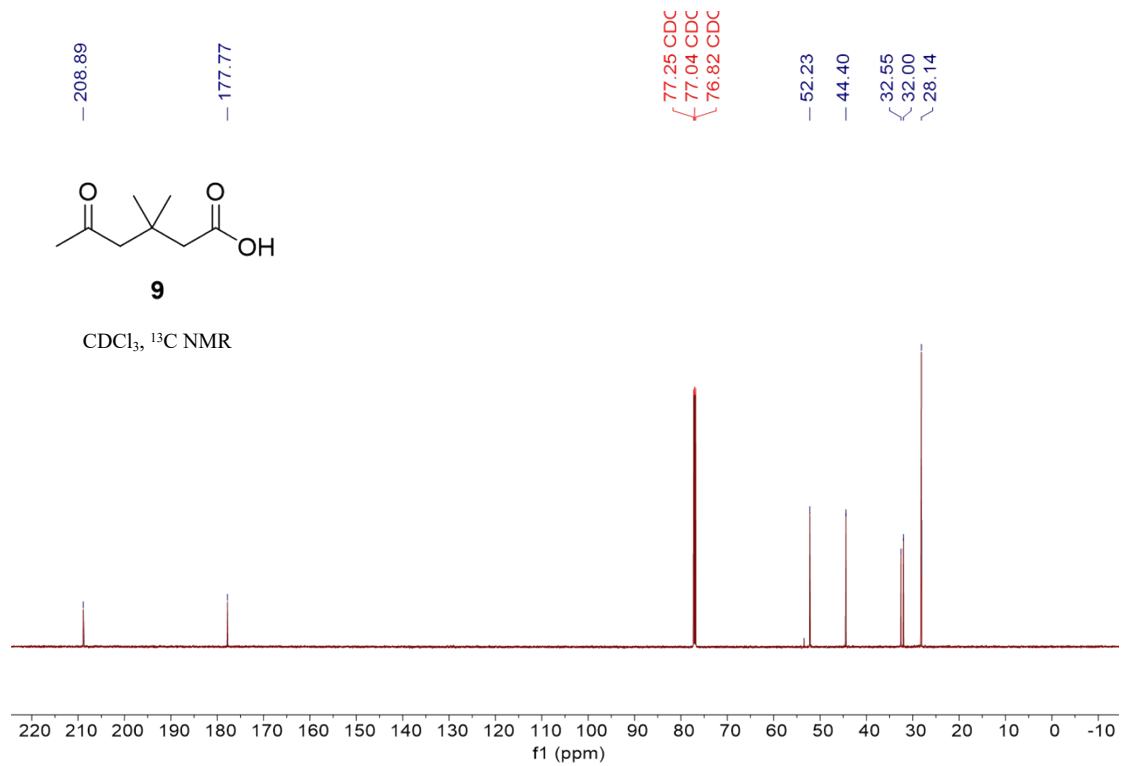

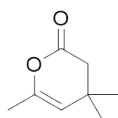

**10**

CDCl<sub>3</sub>, <sup>1</sup>H NMR

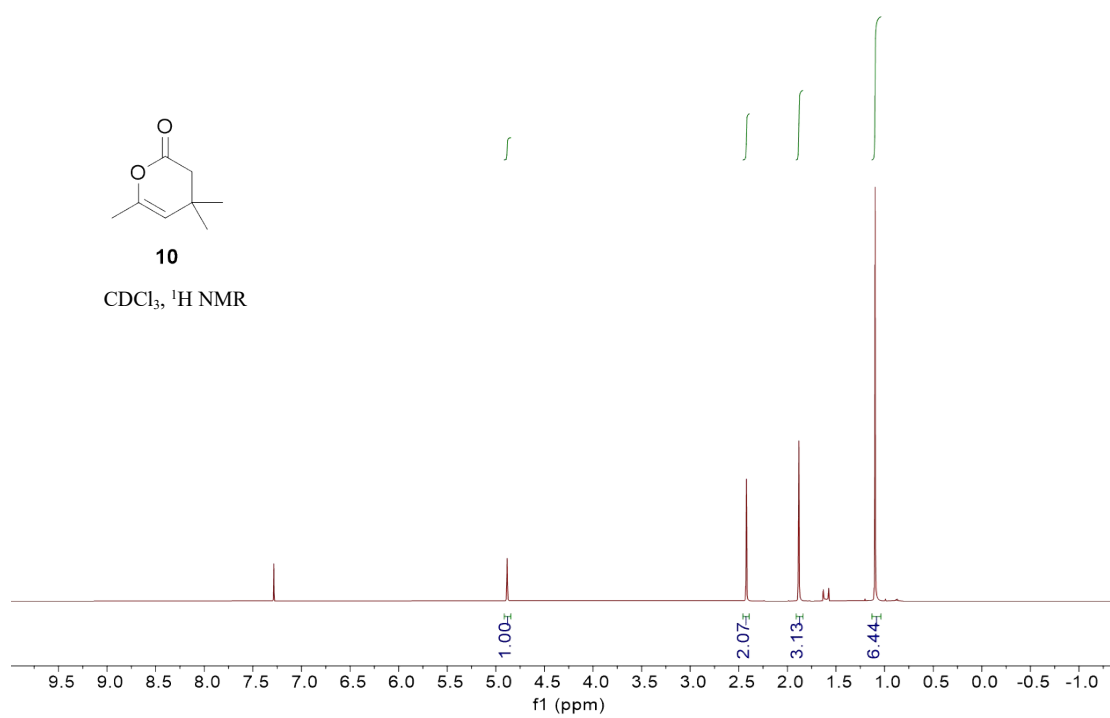

— 169.29

— 147.40

— 111.54  
— 111.24

— 43.28

— 31.01  
— 28.23

— 18.48

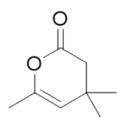

**10**

CDCl<sub>3</sub>, <sup>13</sup>C NMR

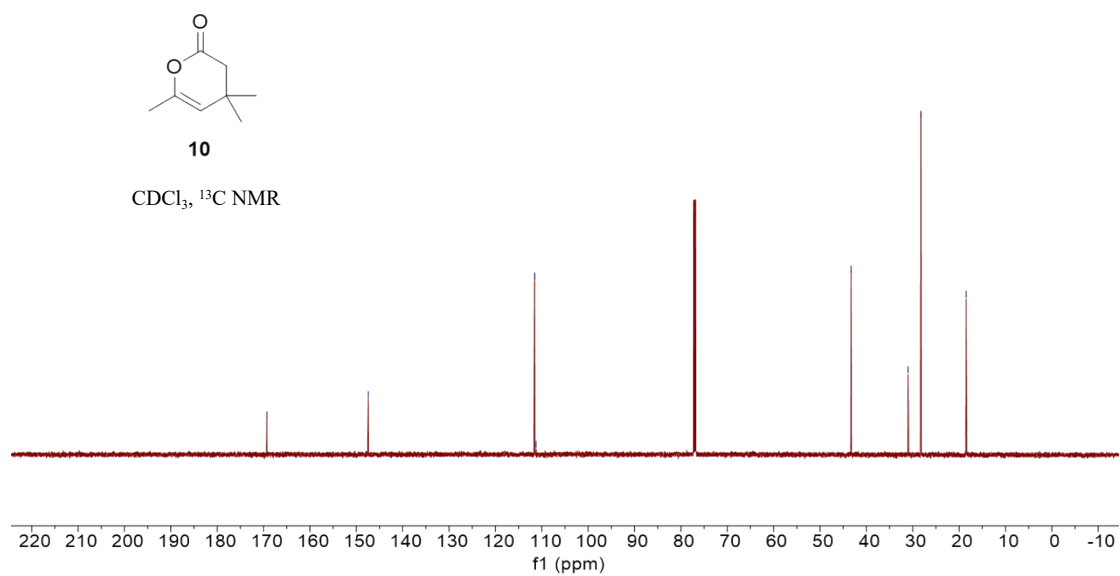

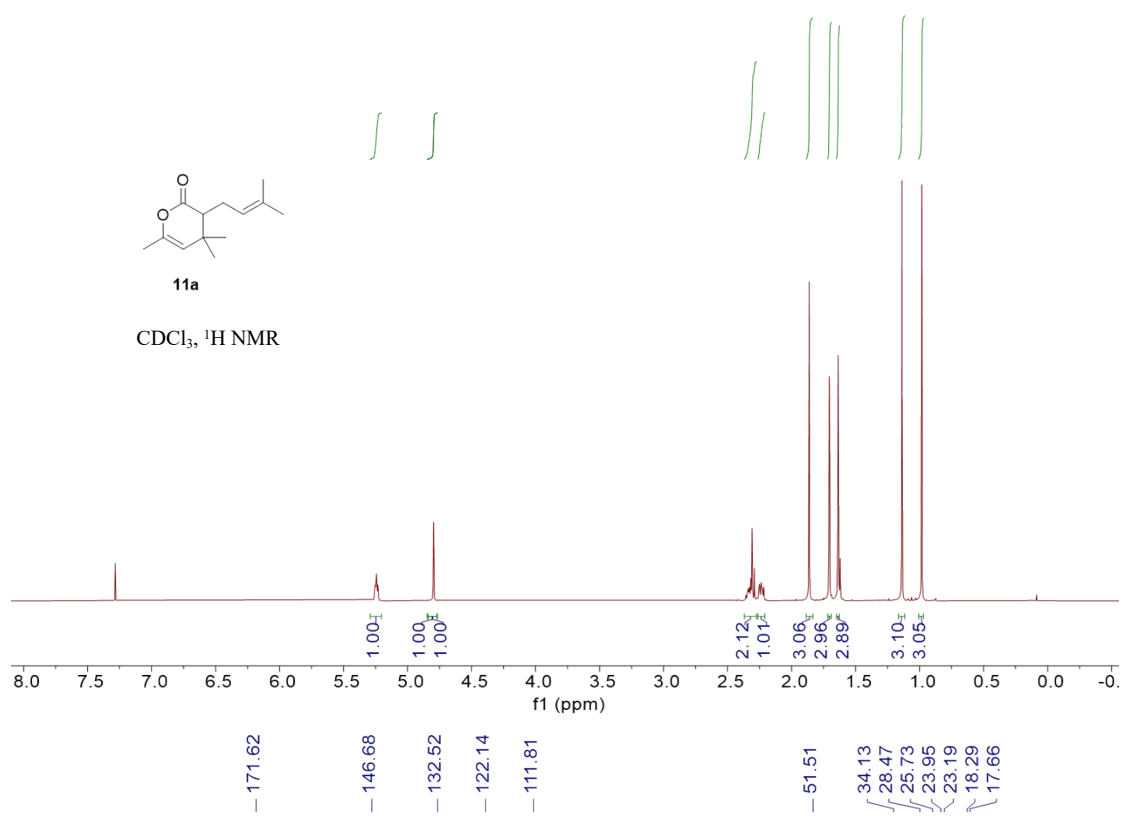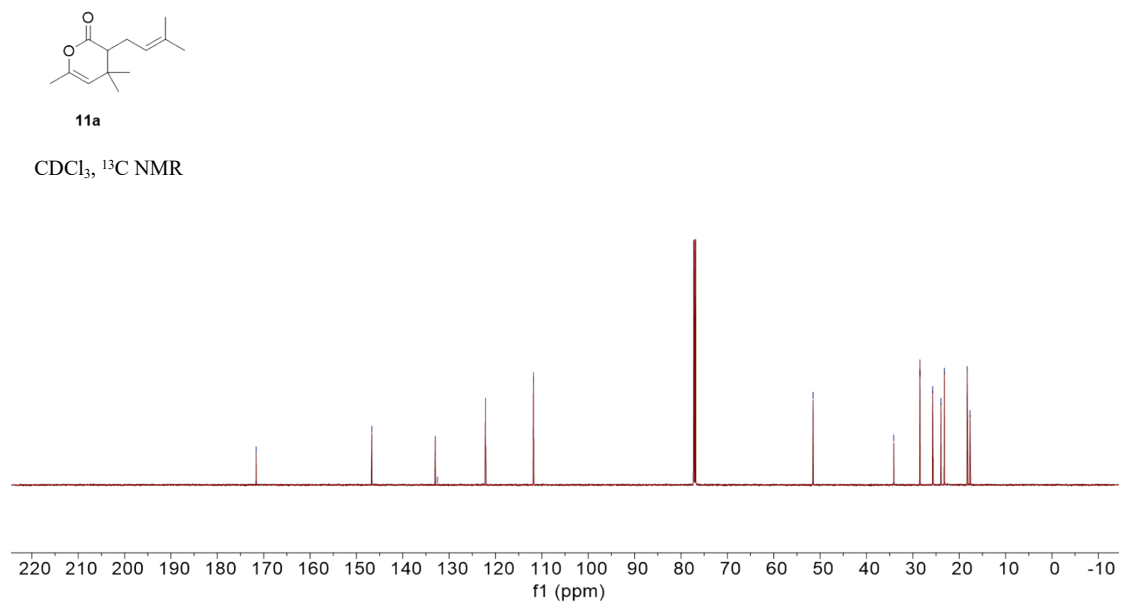

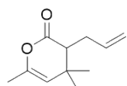

11b

CDCl<sub>3</sub>, <sup>1</sup>H NMR

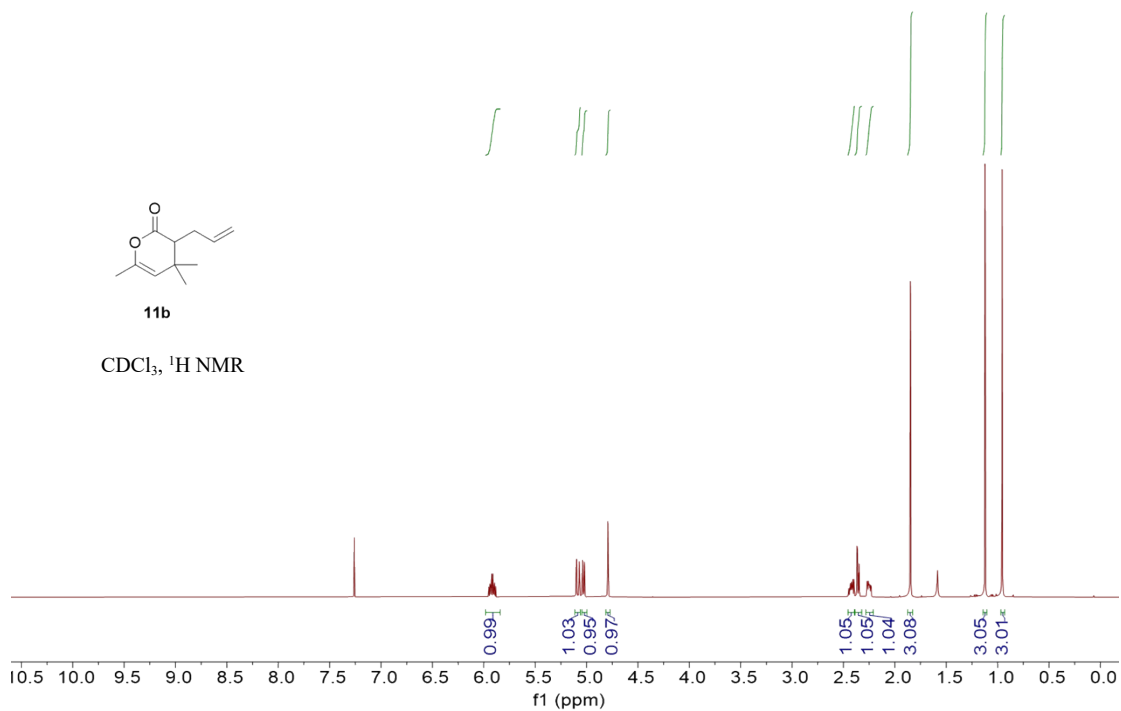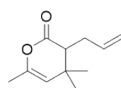

11b

CDCl<sub>3</sub>, <sup>13</sup>C NMR

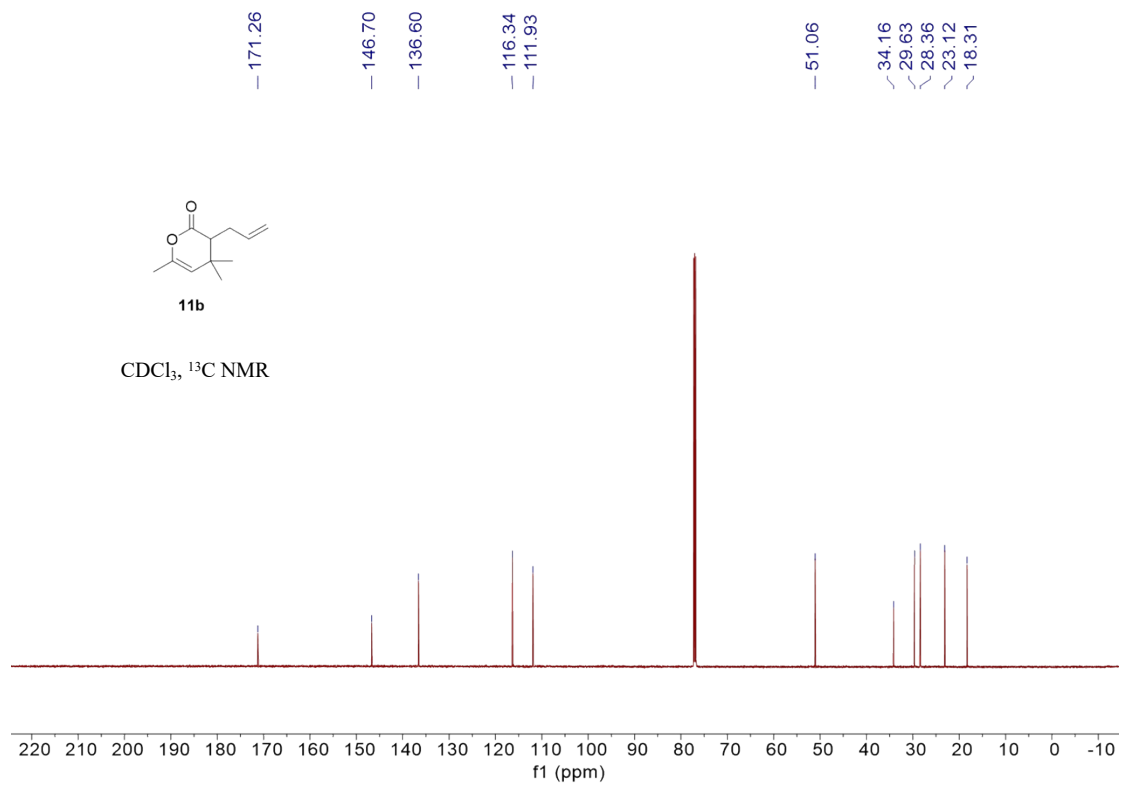

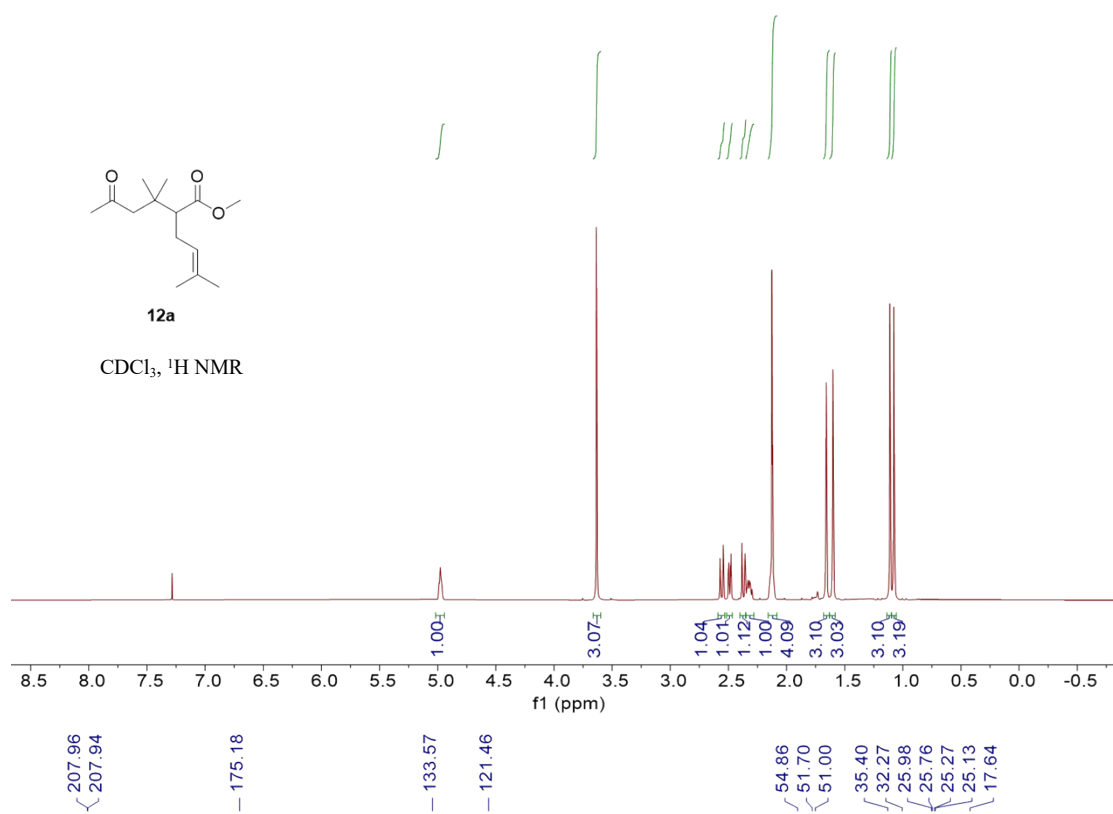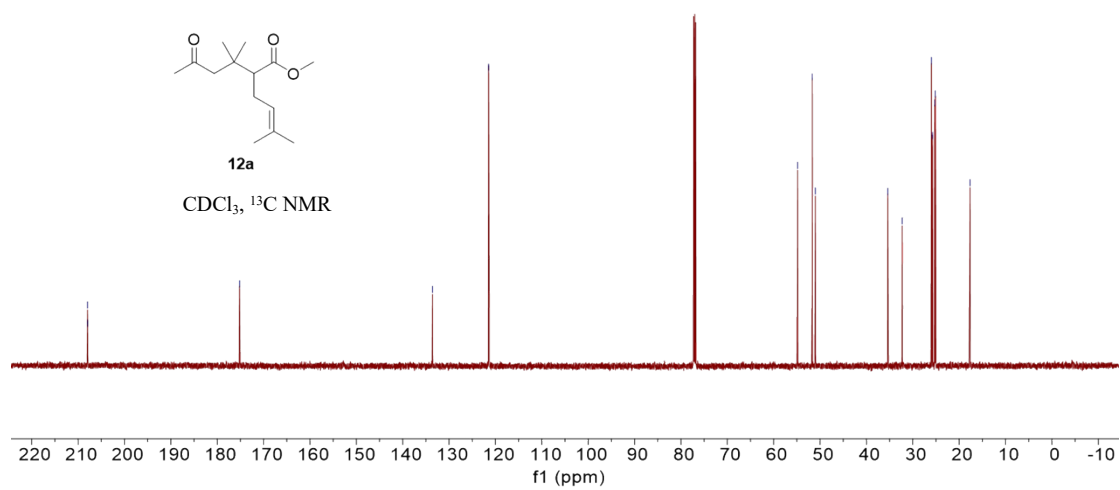

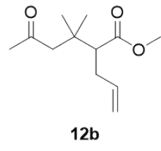

CDCl<sub>3</sub>, <sup>1</sup>H NMR

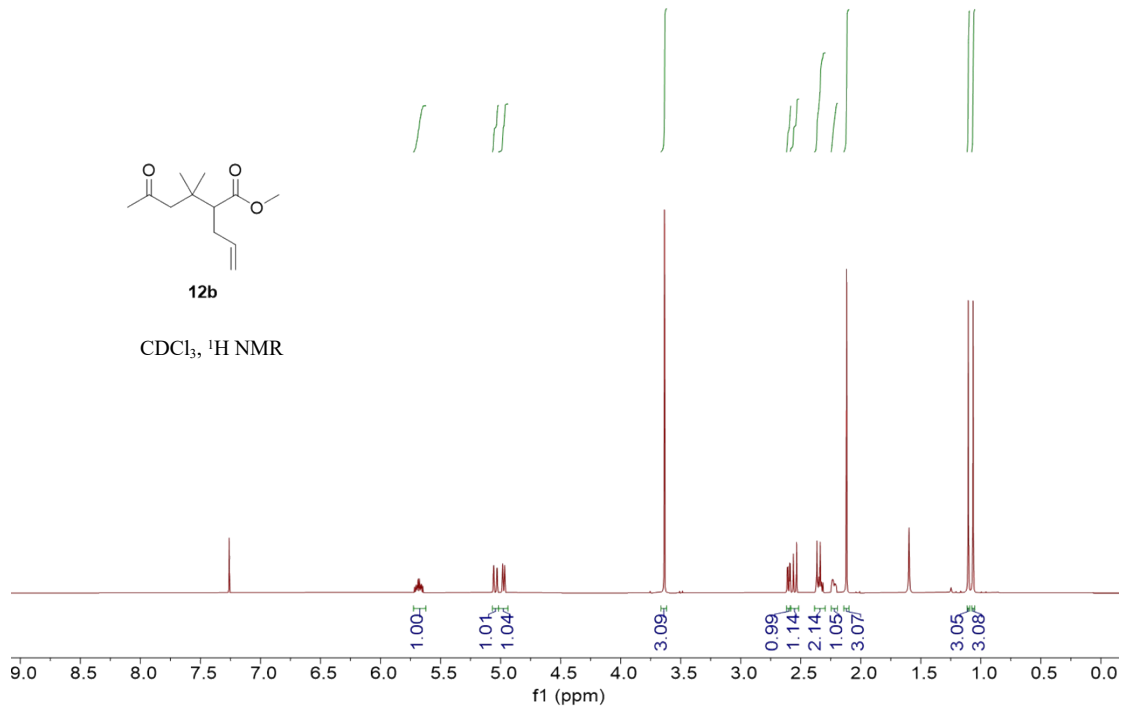

-207.88

-174.79

-135.91

-116.59

54.17

51.74

51.03

35.42

32.26

31.62

25.28

25.13

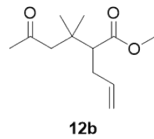

CDCl<sub>3</sub>, <sup>13</sup>C NMR

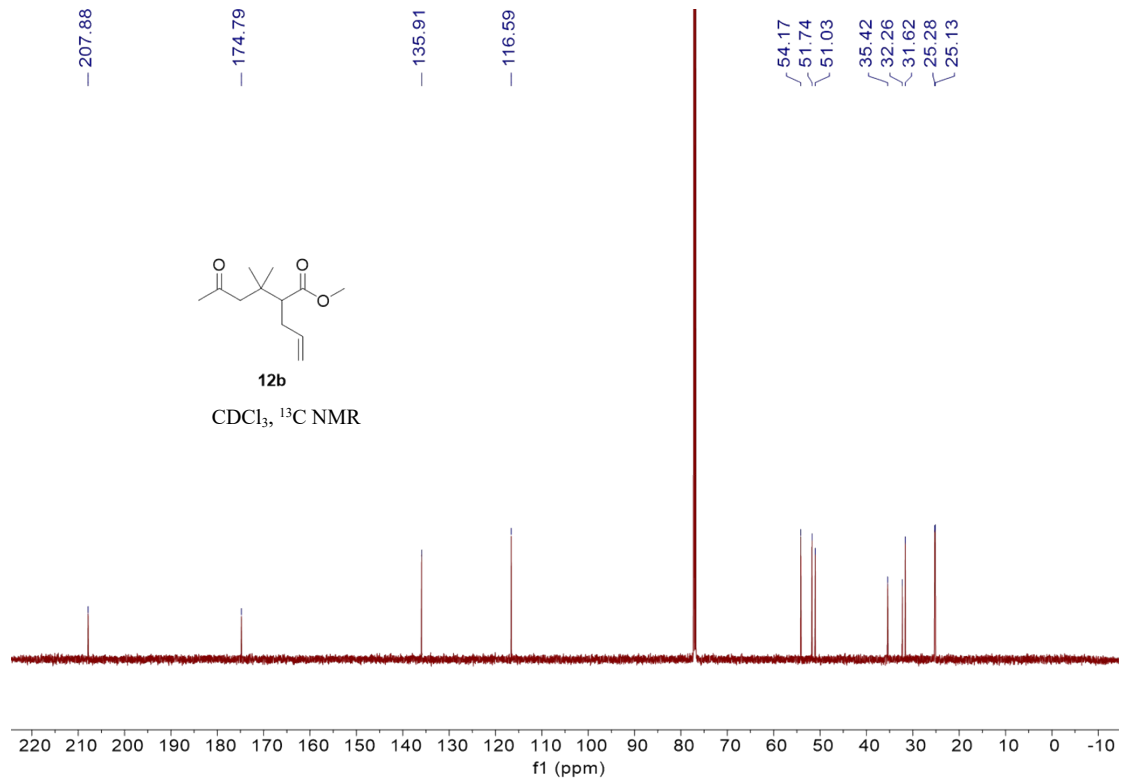

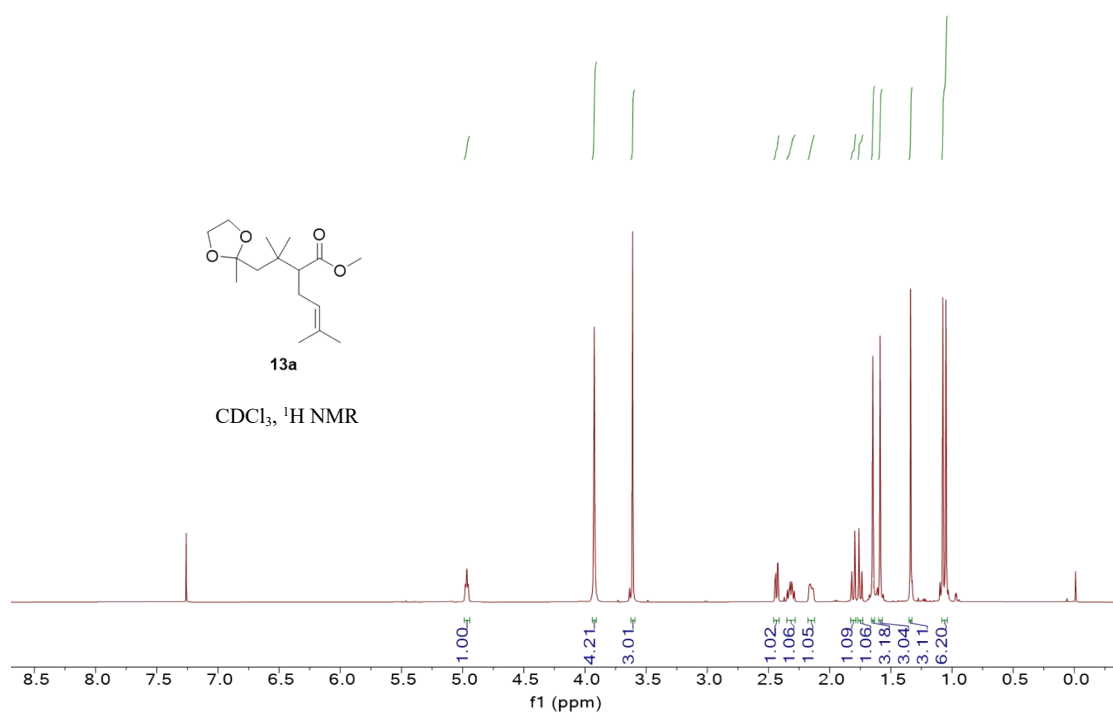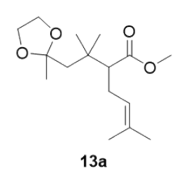

CDCl<sub>3</sub>, <sup>1</sup>H NMR

- 175.76
- 133.26
- 122.10
- 110.68
- 64.07
- 63.89
- 55.99
- 51.00
- 46.65
- 35.26
- 26.66
- 26.39
- 26.34
- 25.96
- 25.60
- 17.81

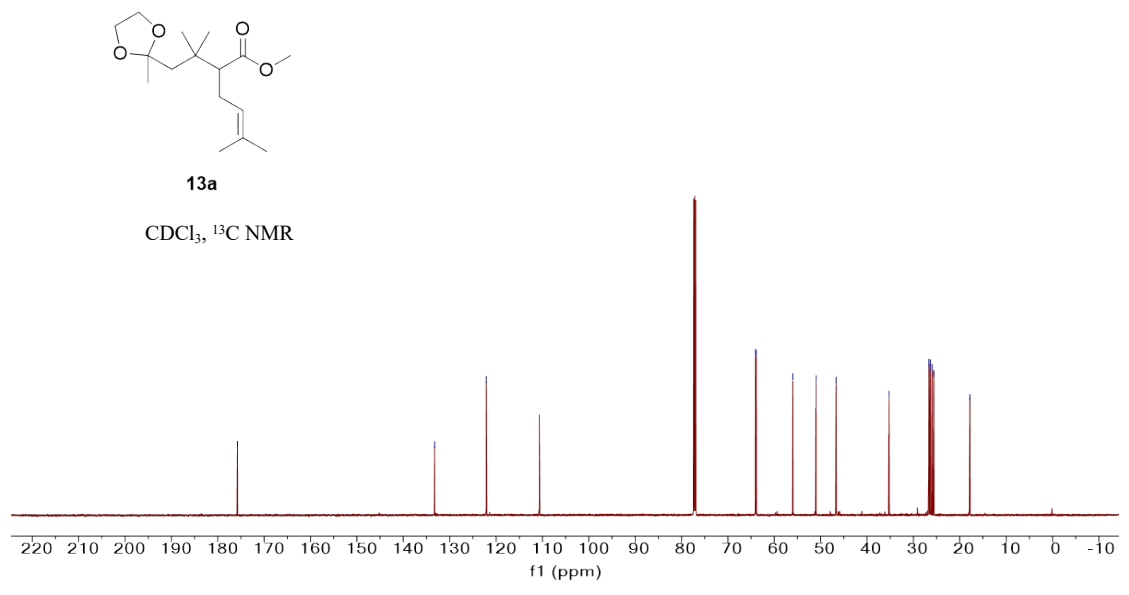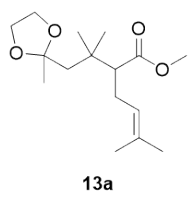

CDCl<sub>3</sub>, <sup>13</sup>C NMR



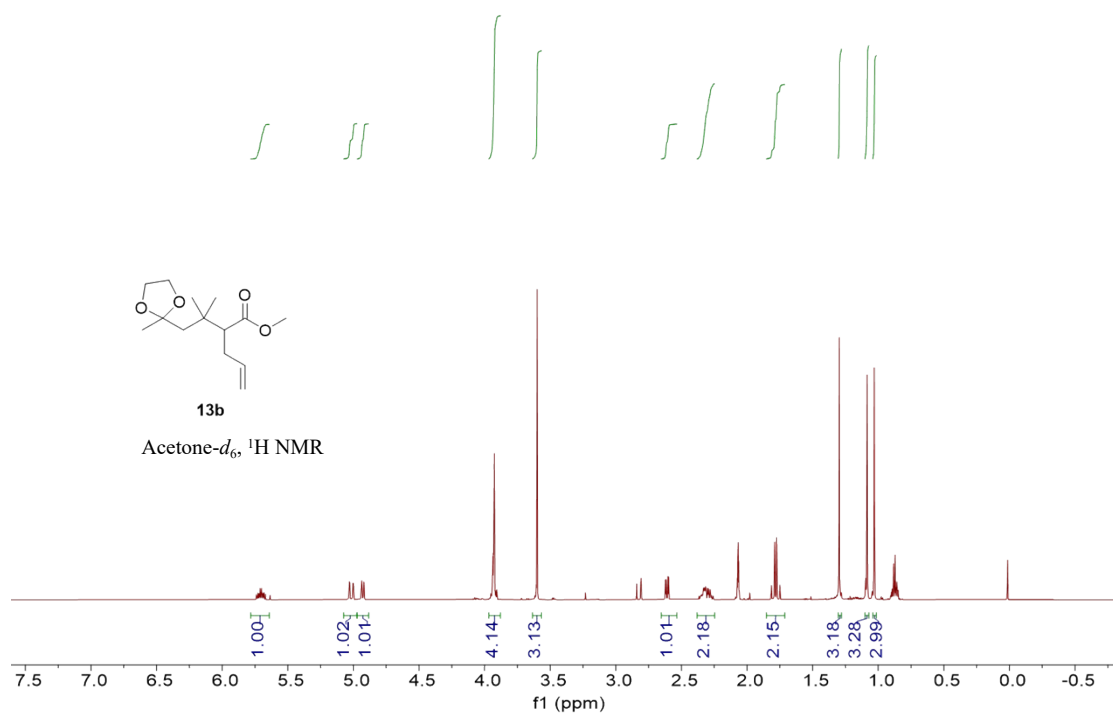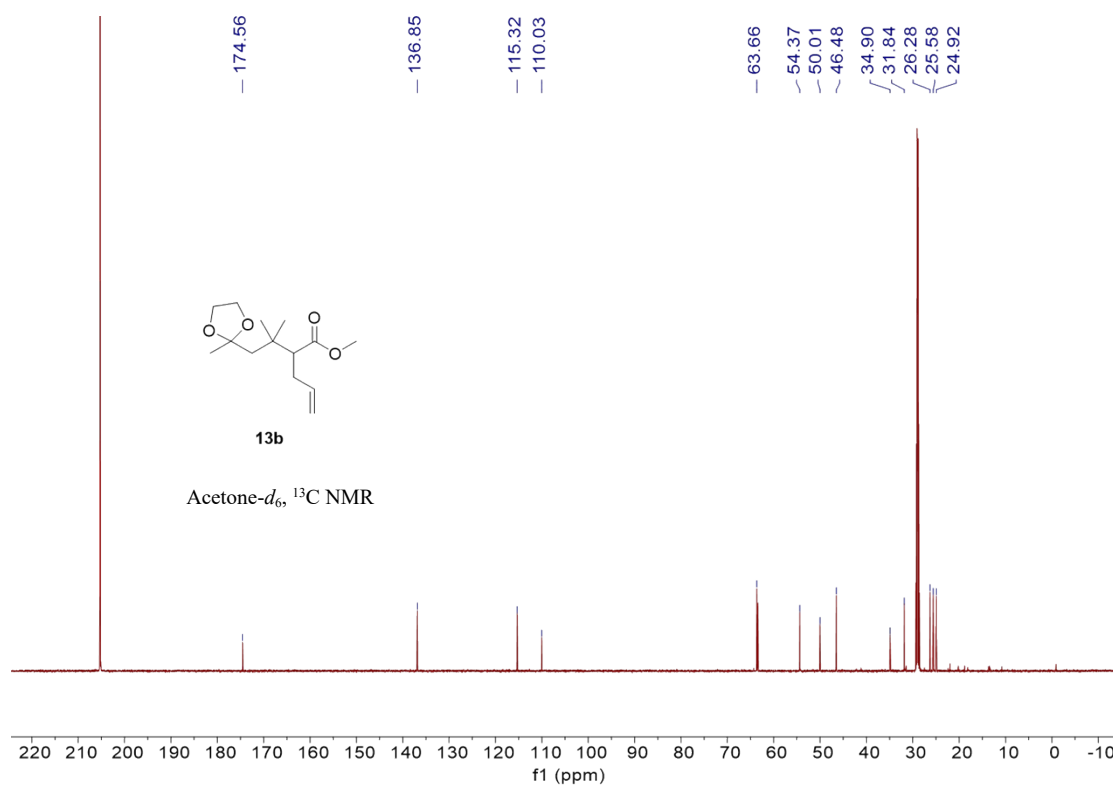

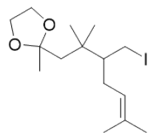

14a

CDCl<sub>3</sub>, <sup>1</sup>H NMR

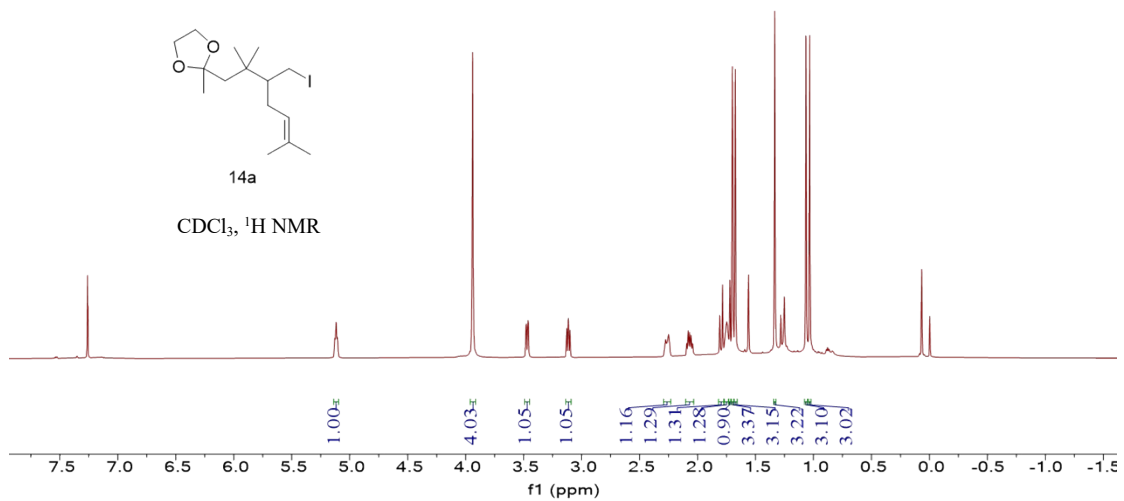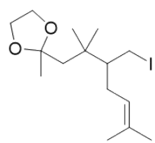

14a

CDCl<sub>3</sub>, <sup>13</sup>C NMR

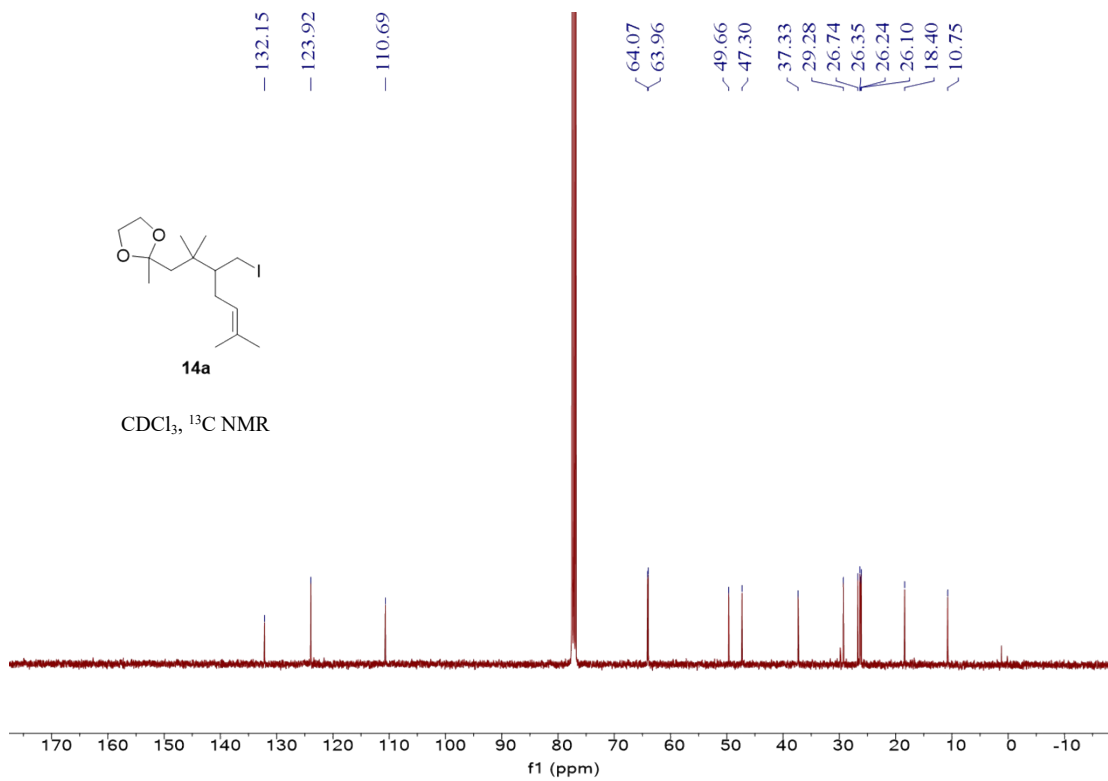

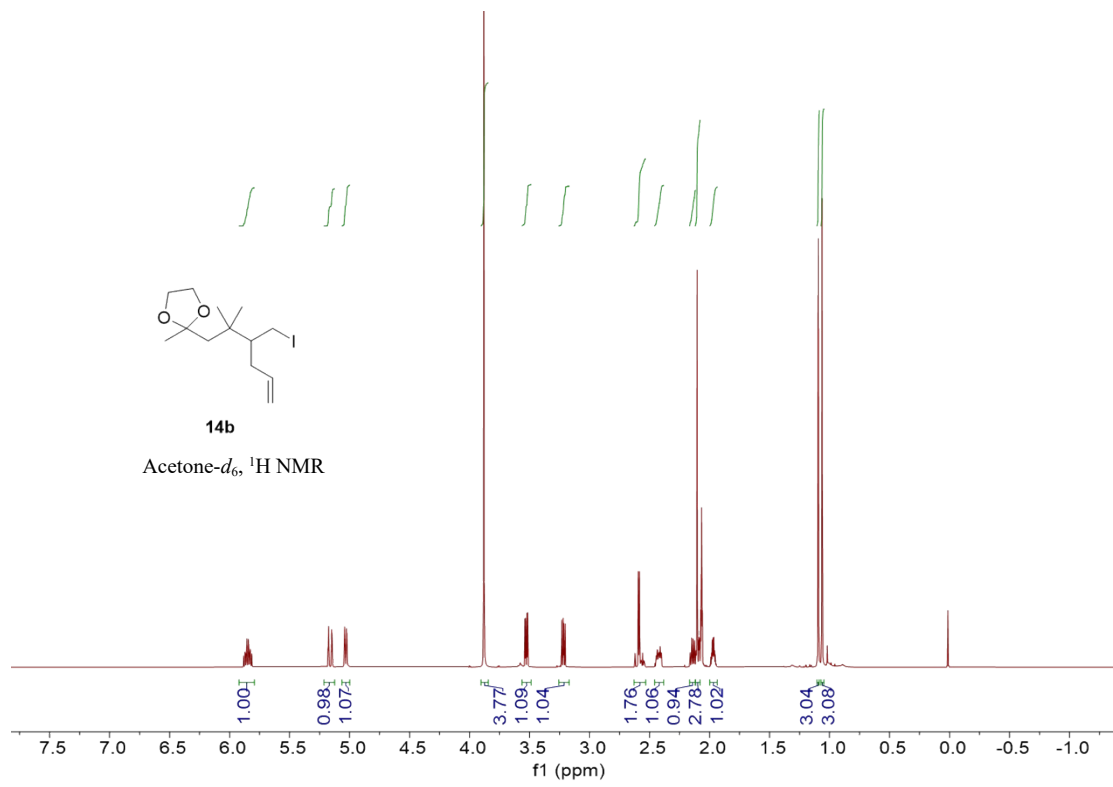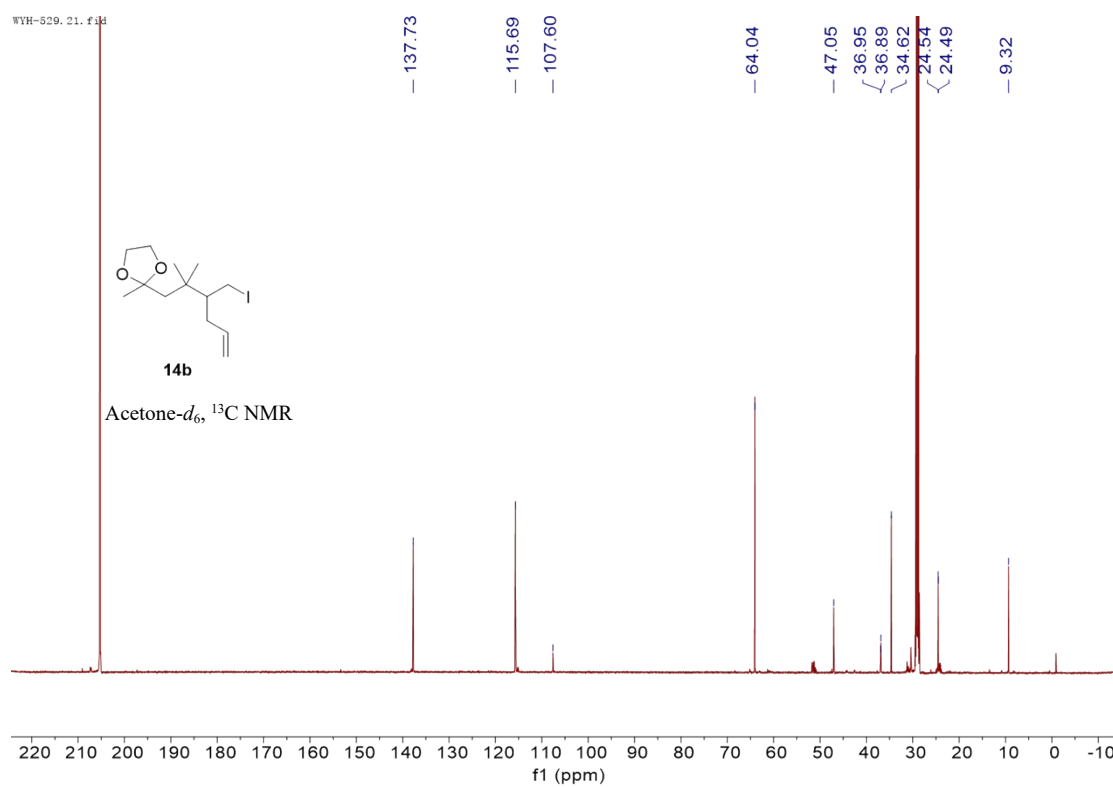

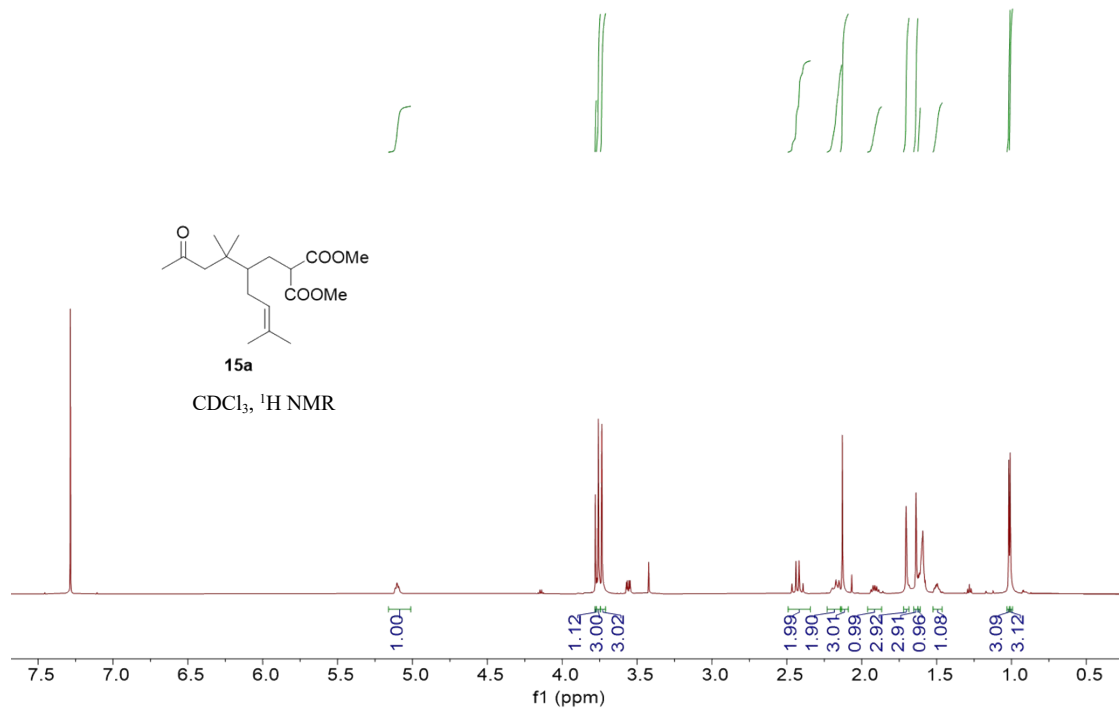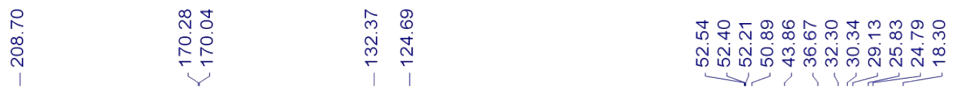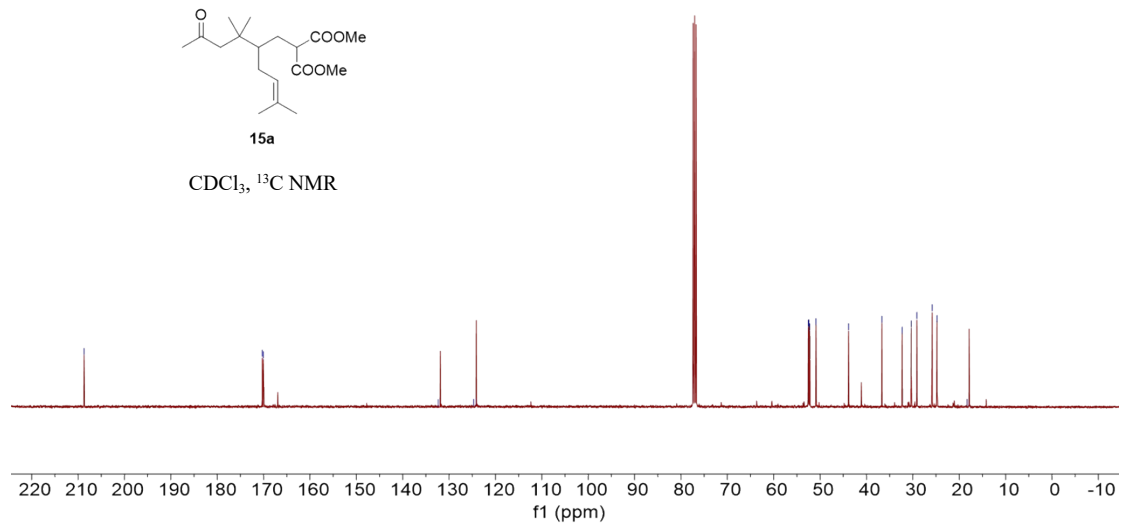

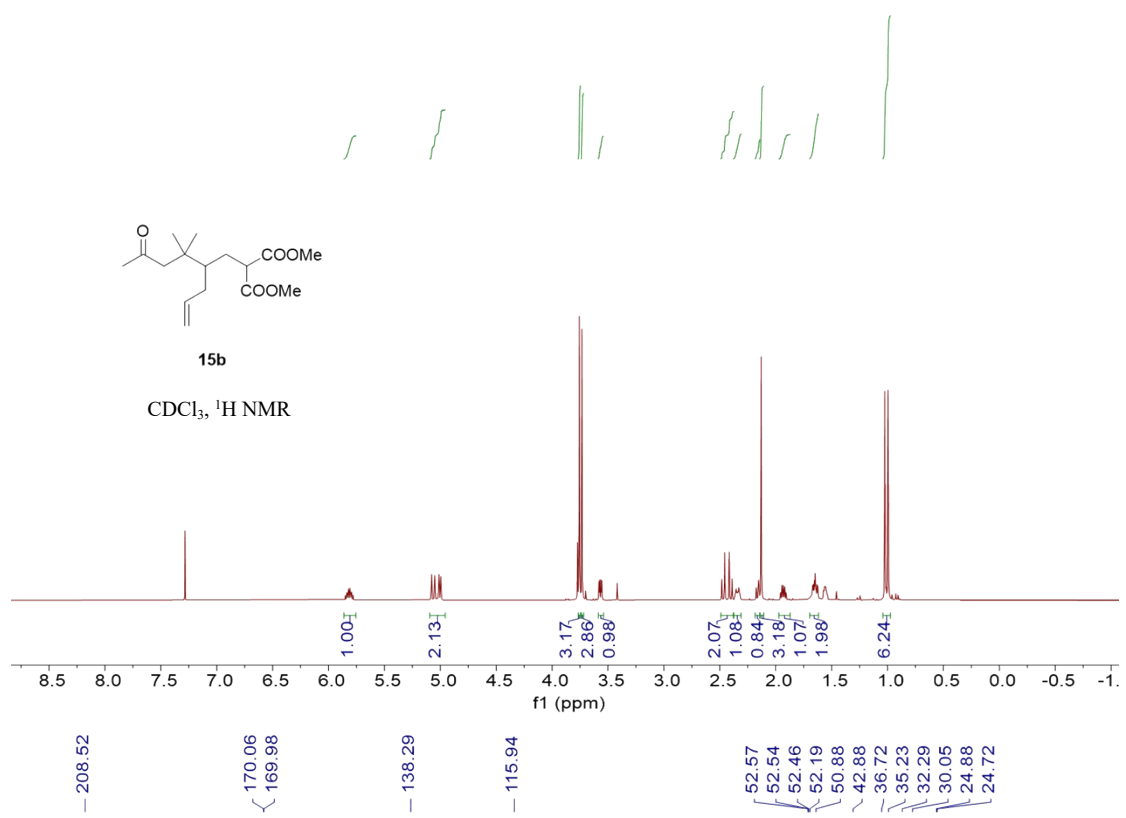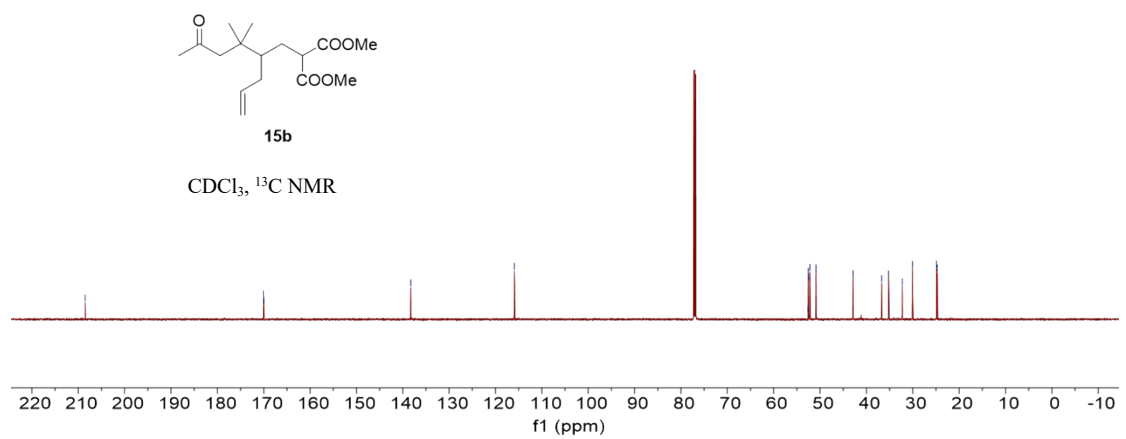



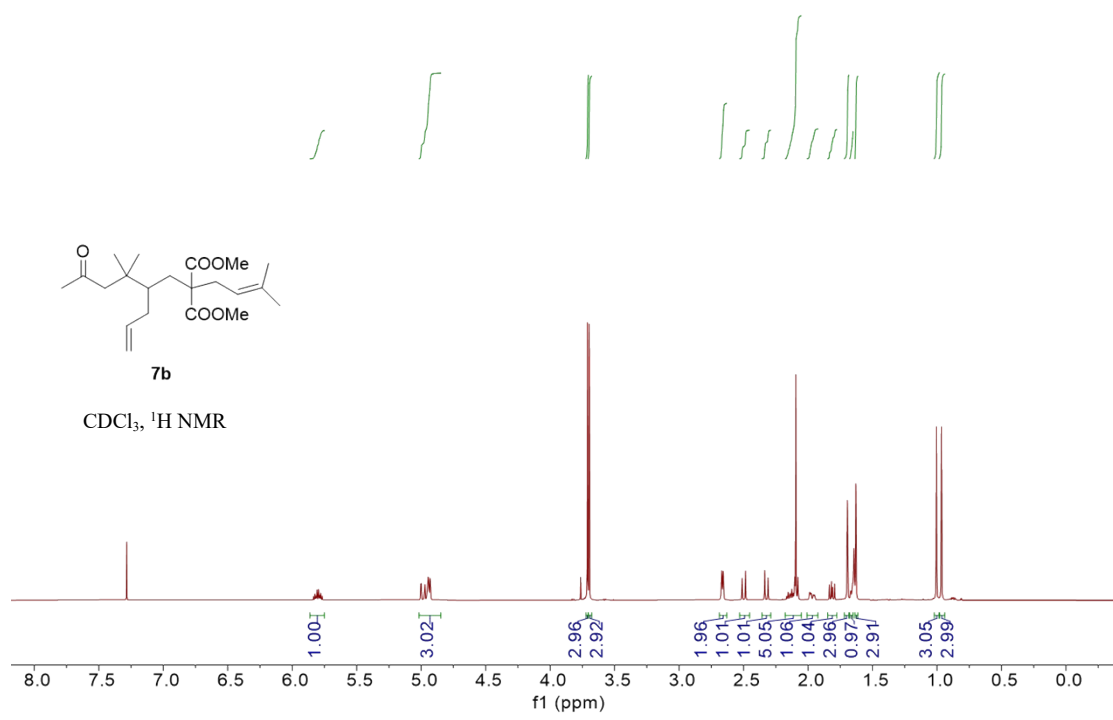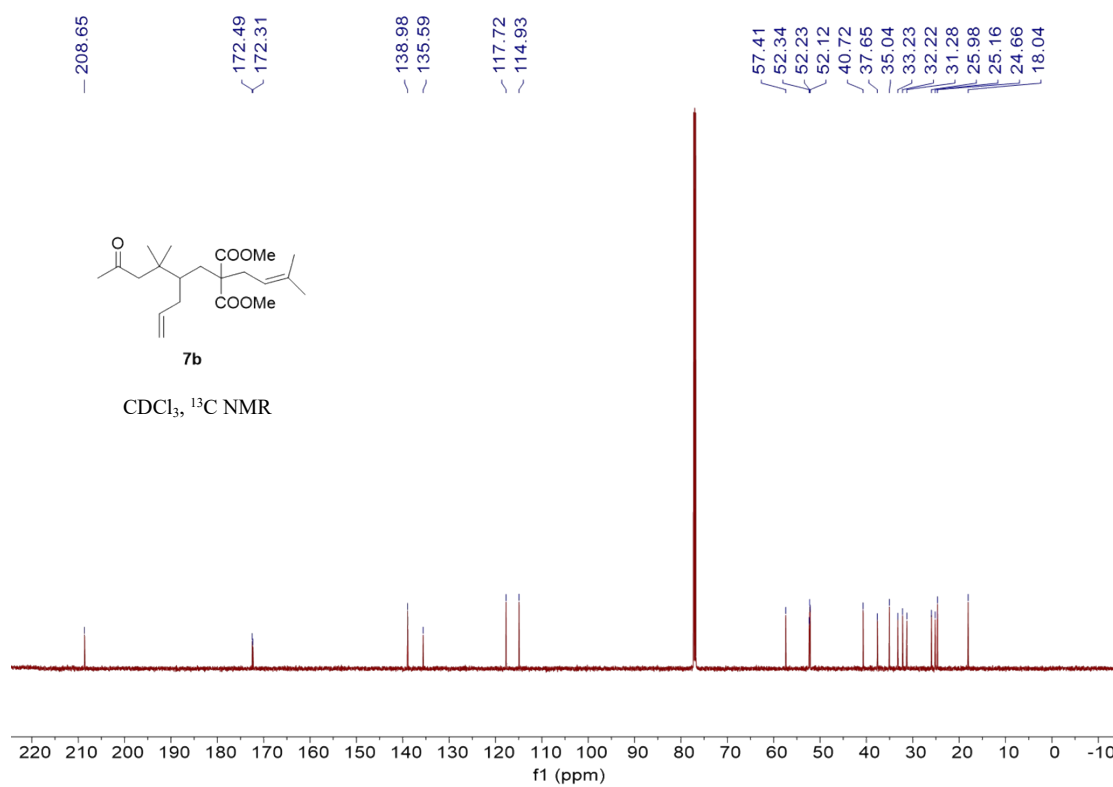

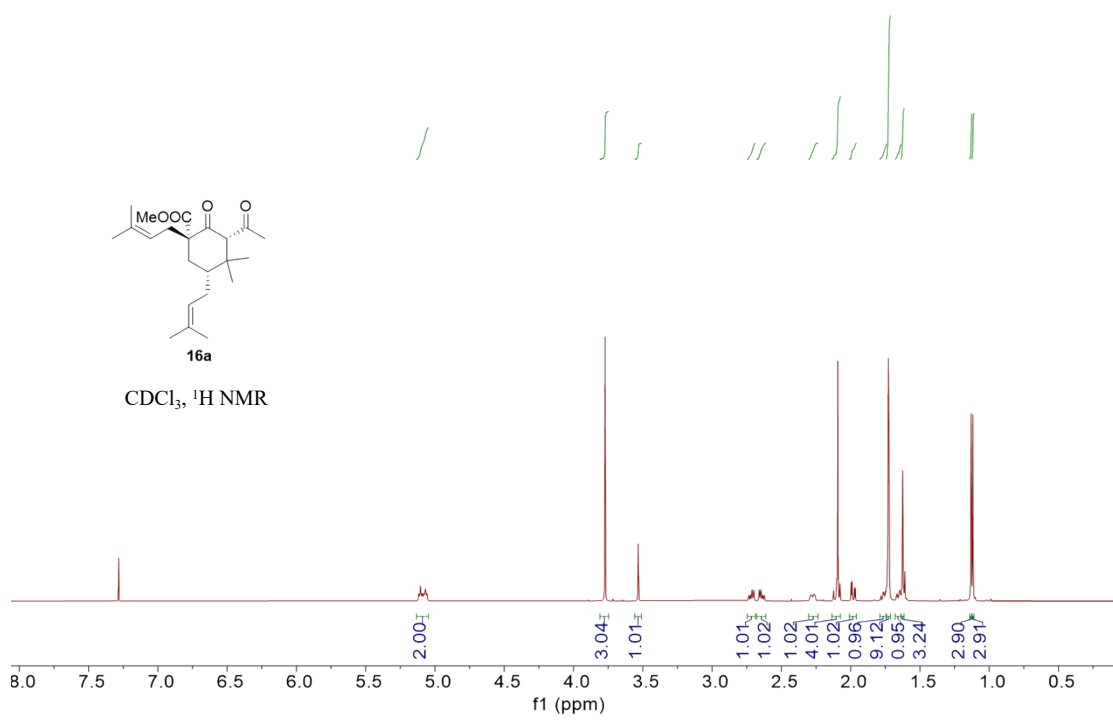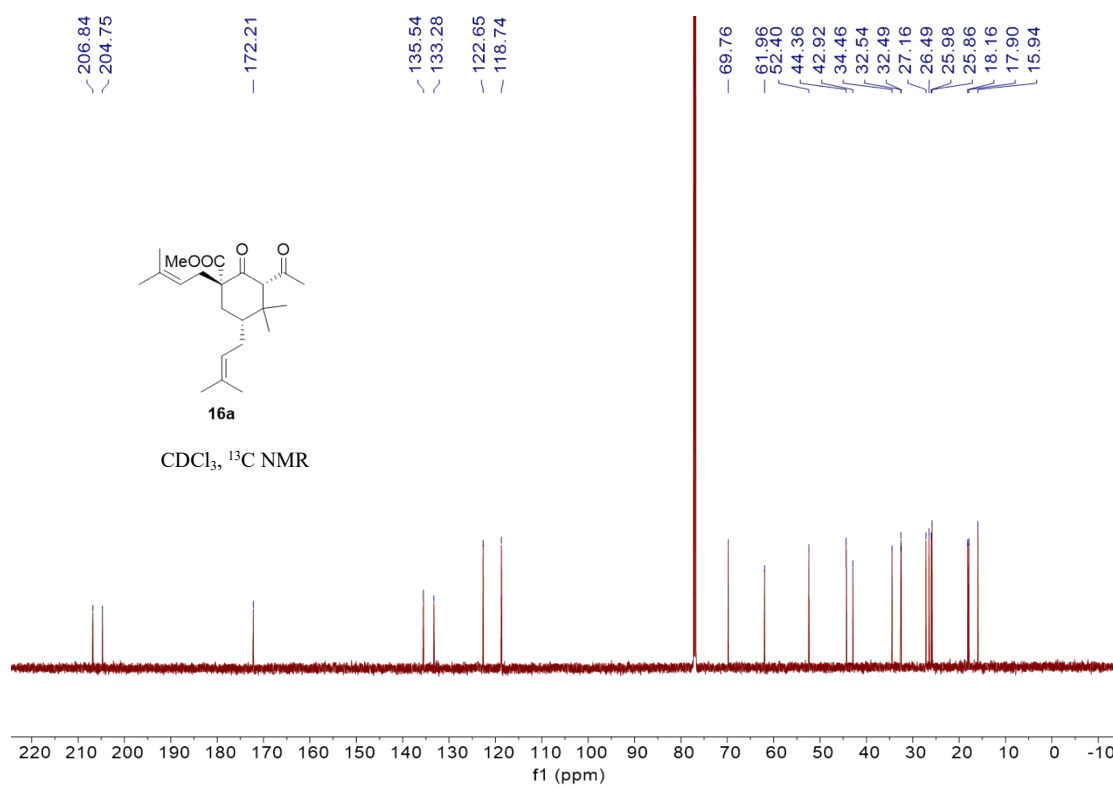



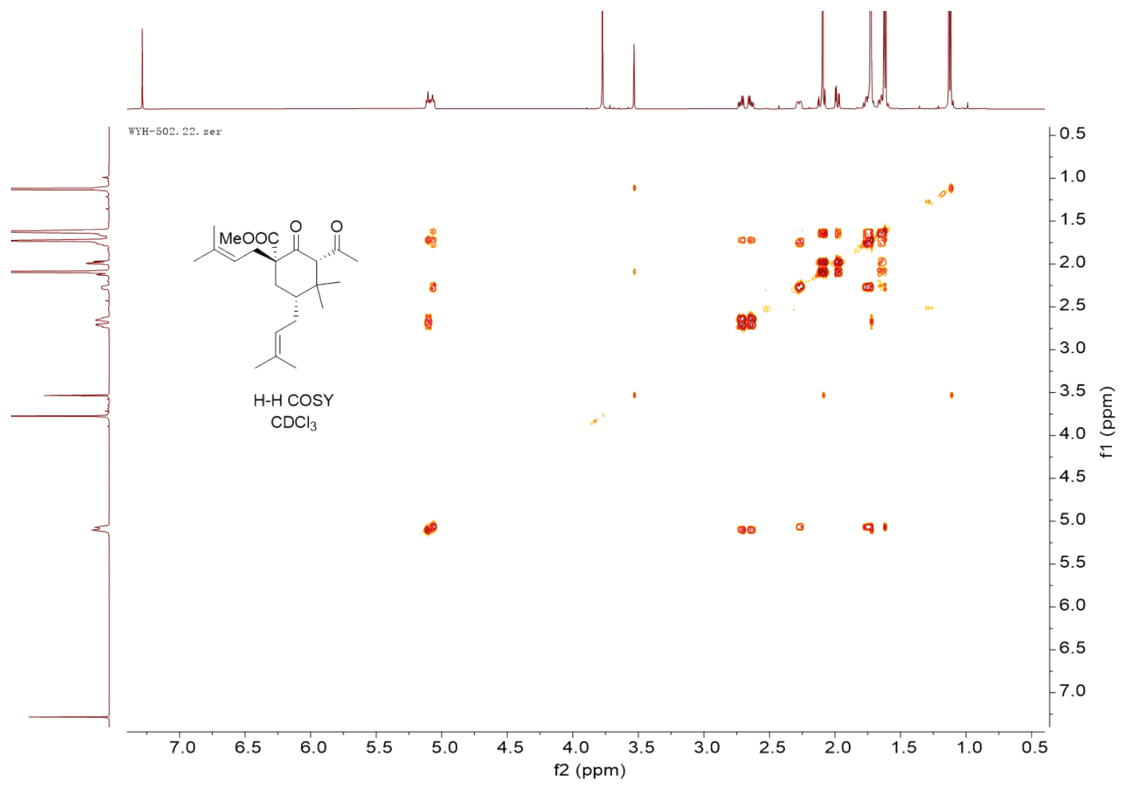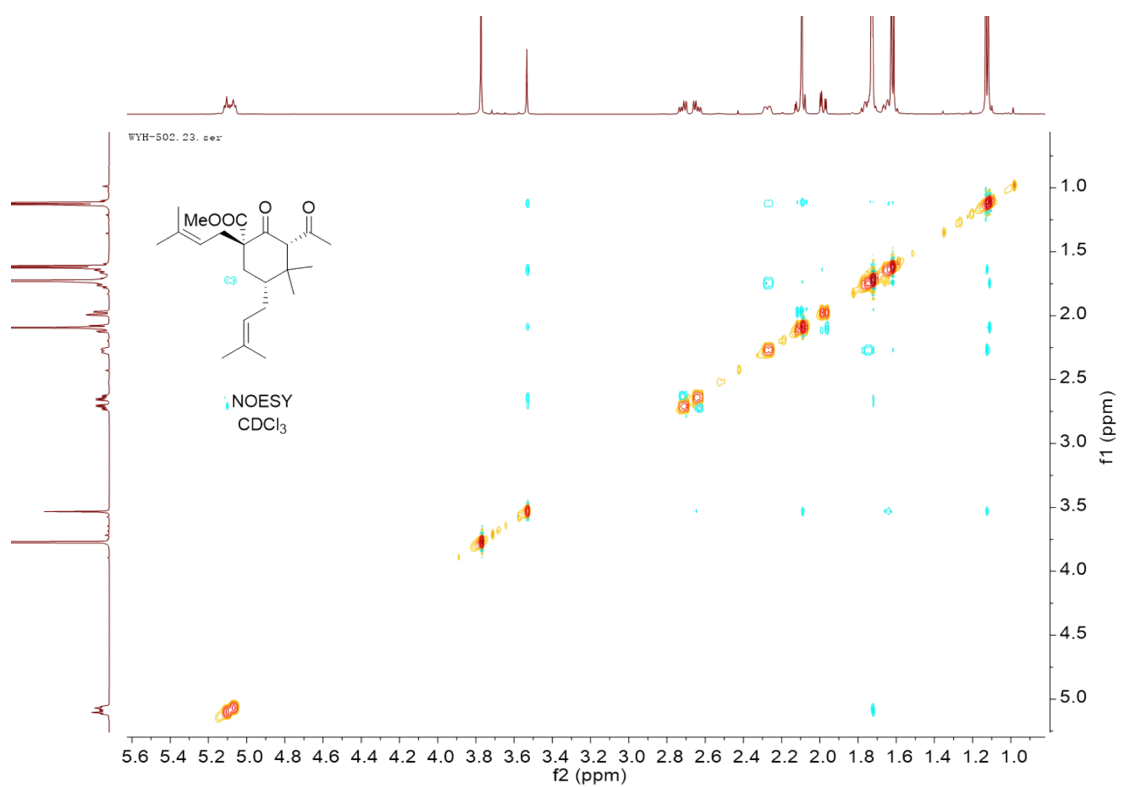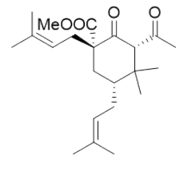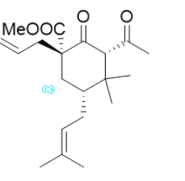

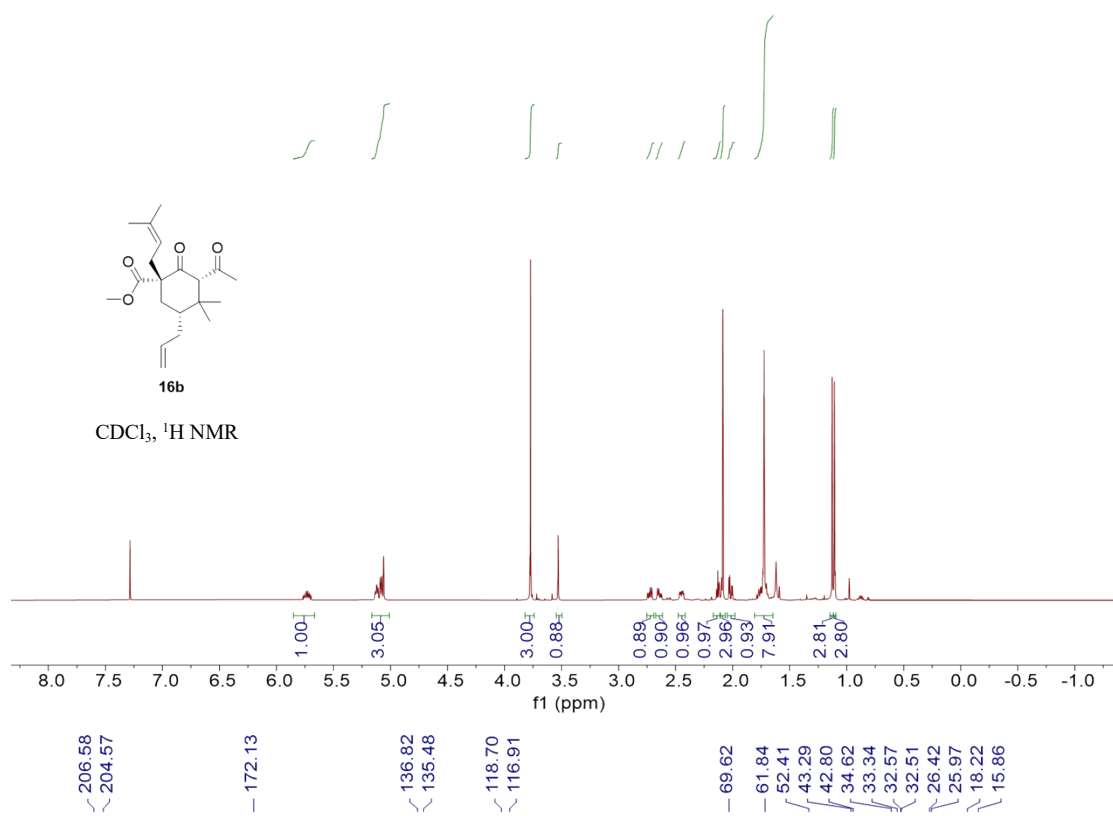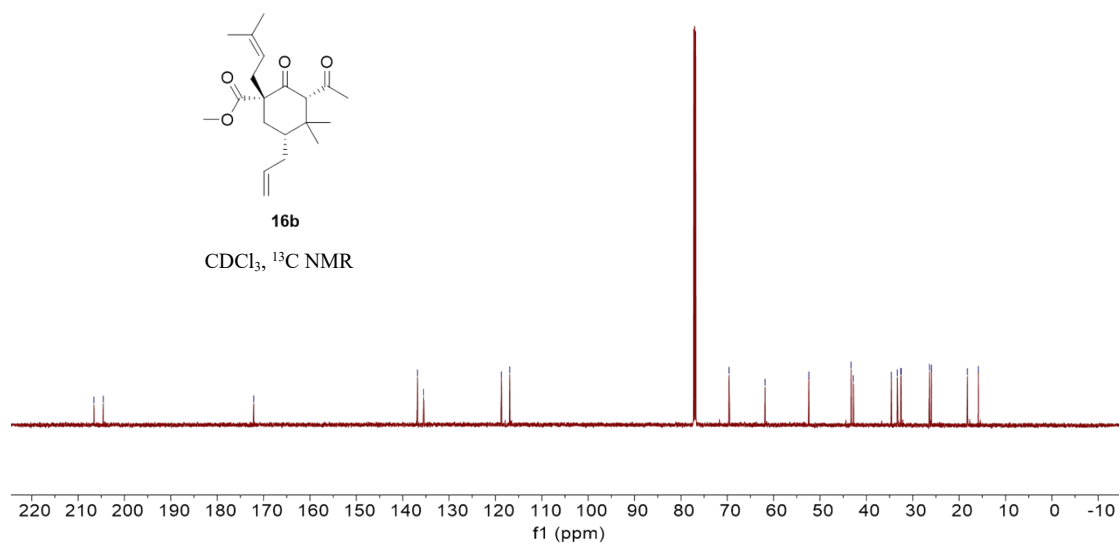

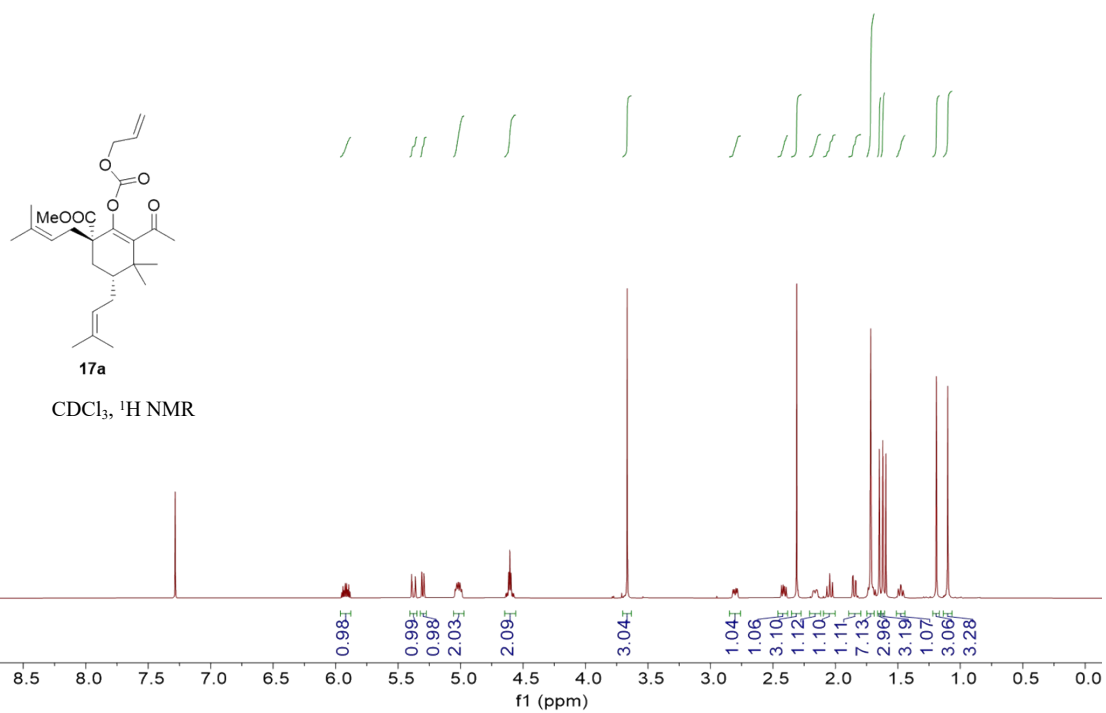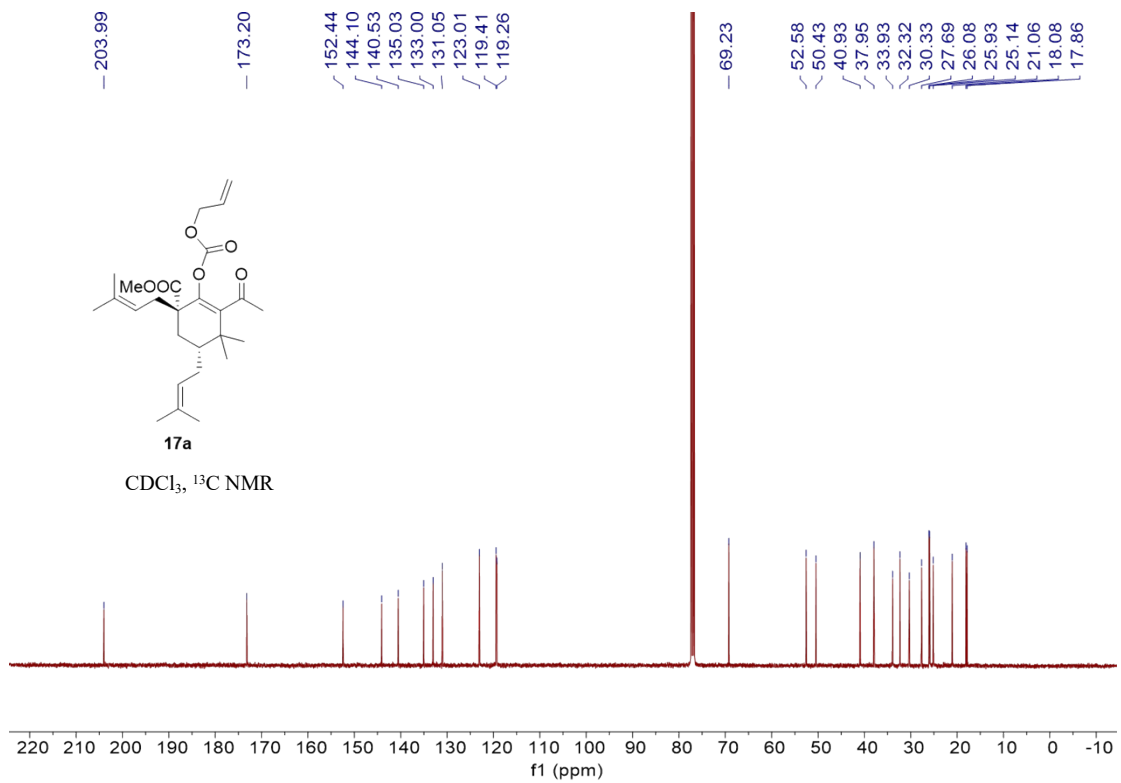

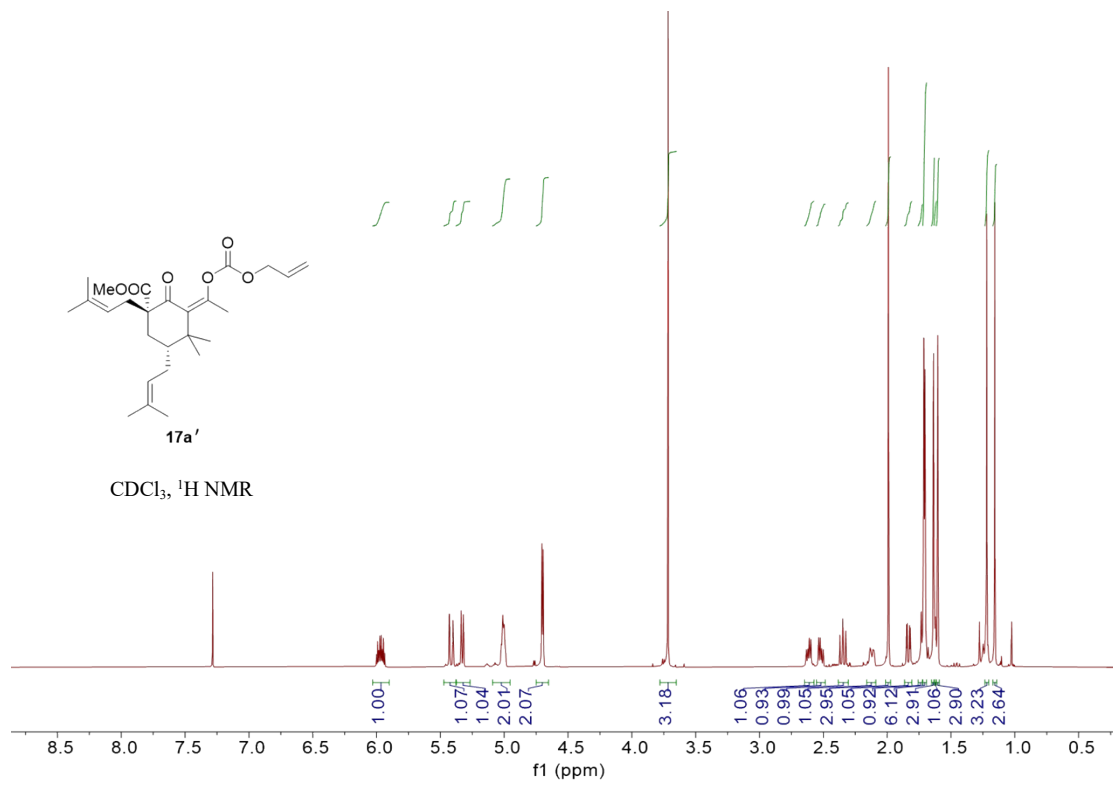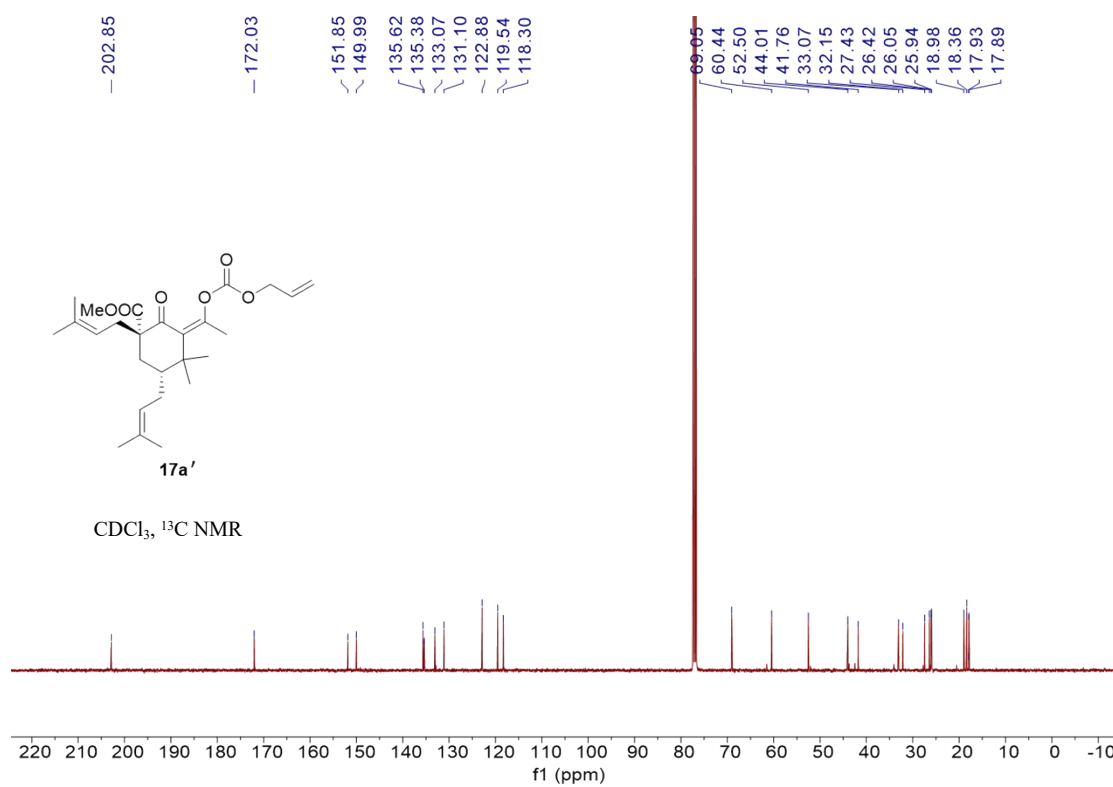

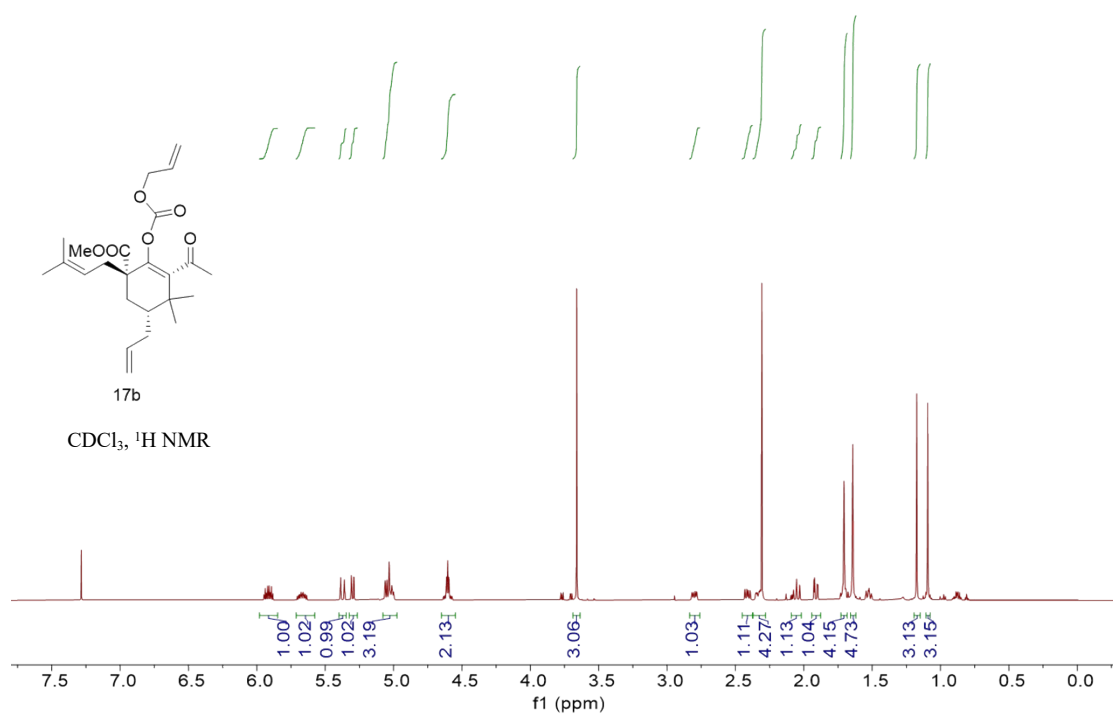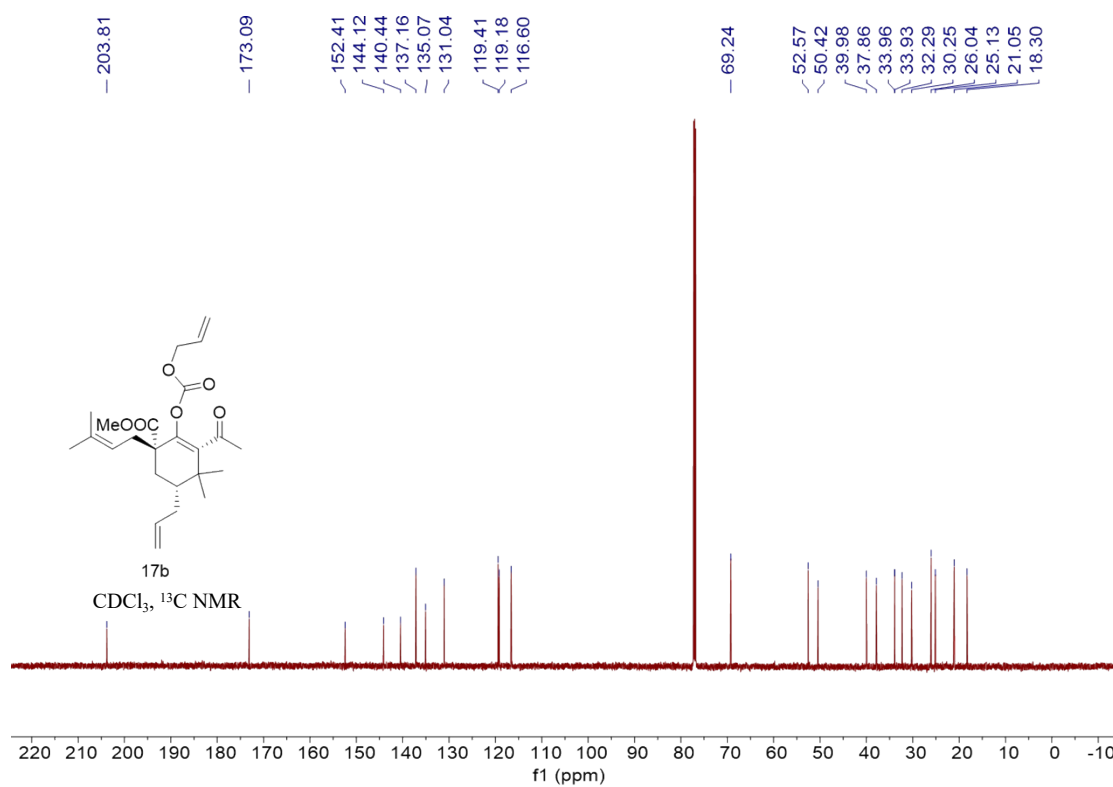

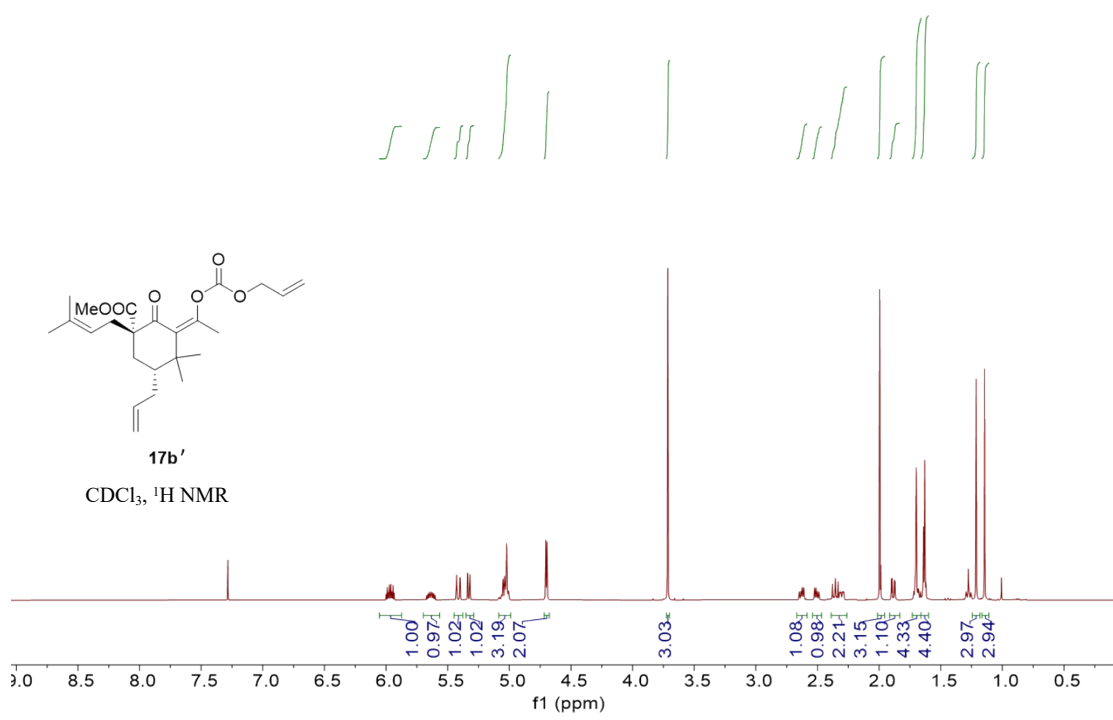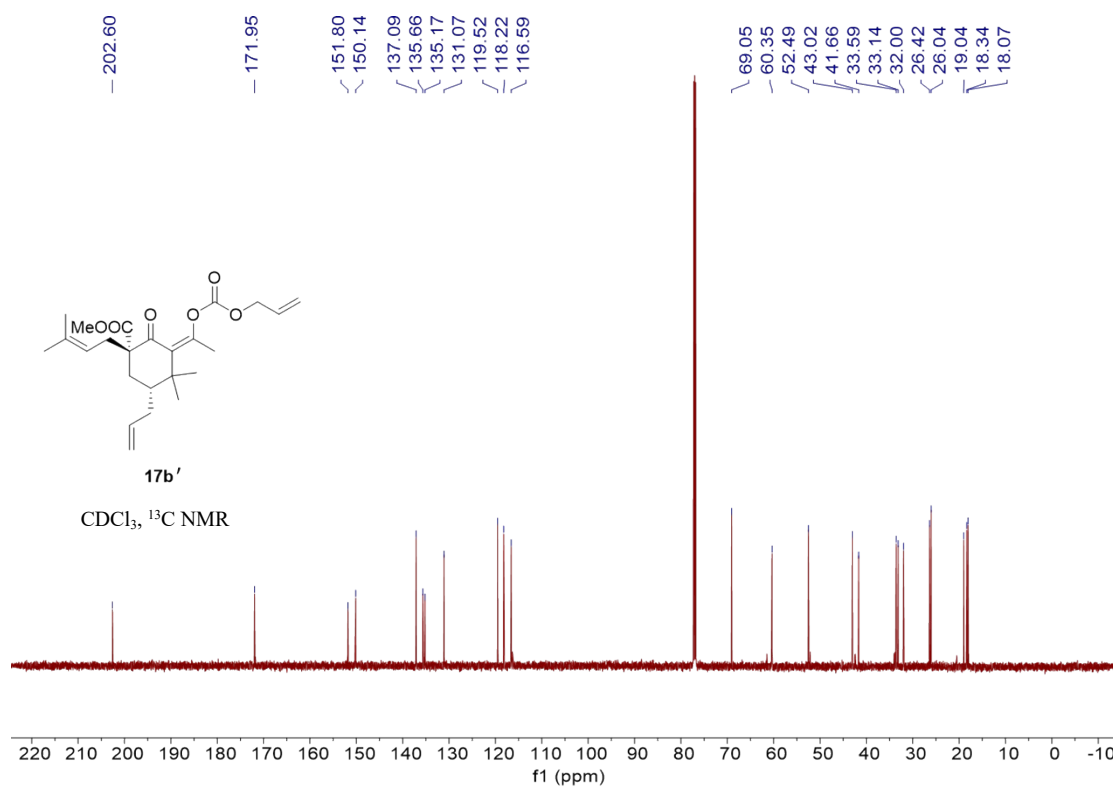

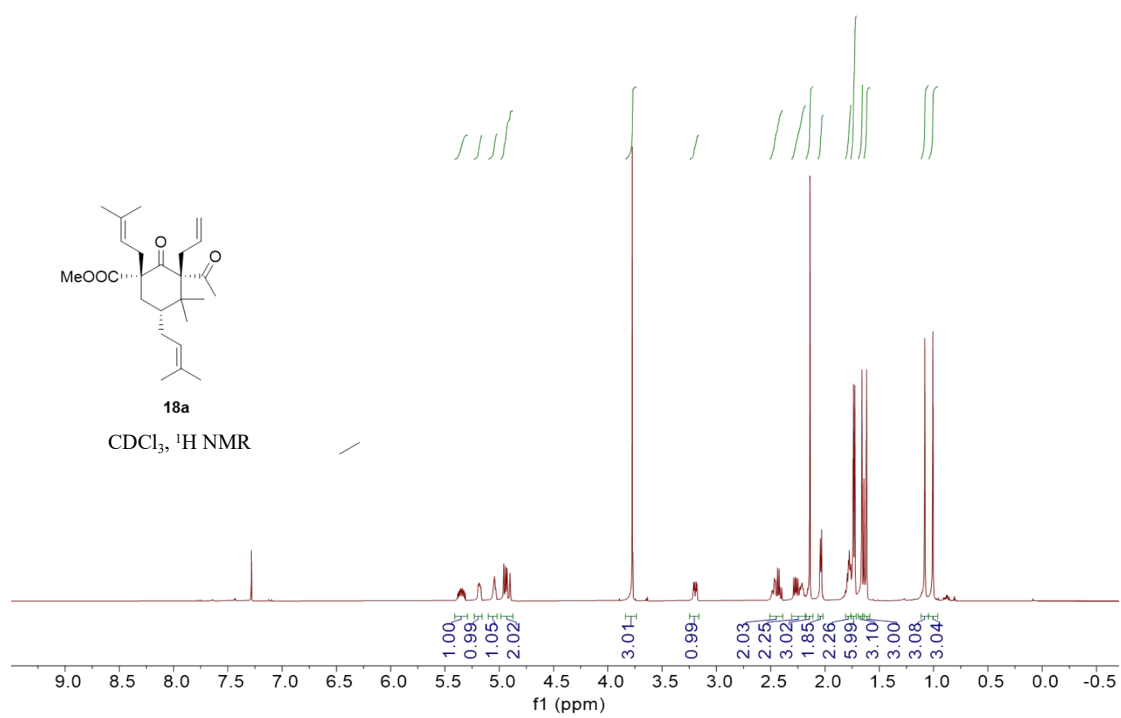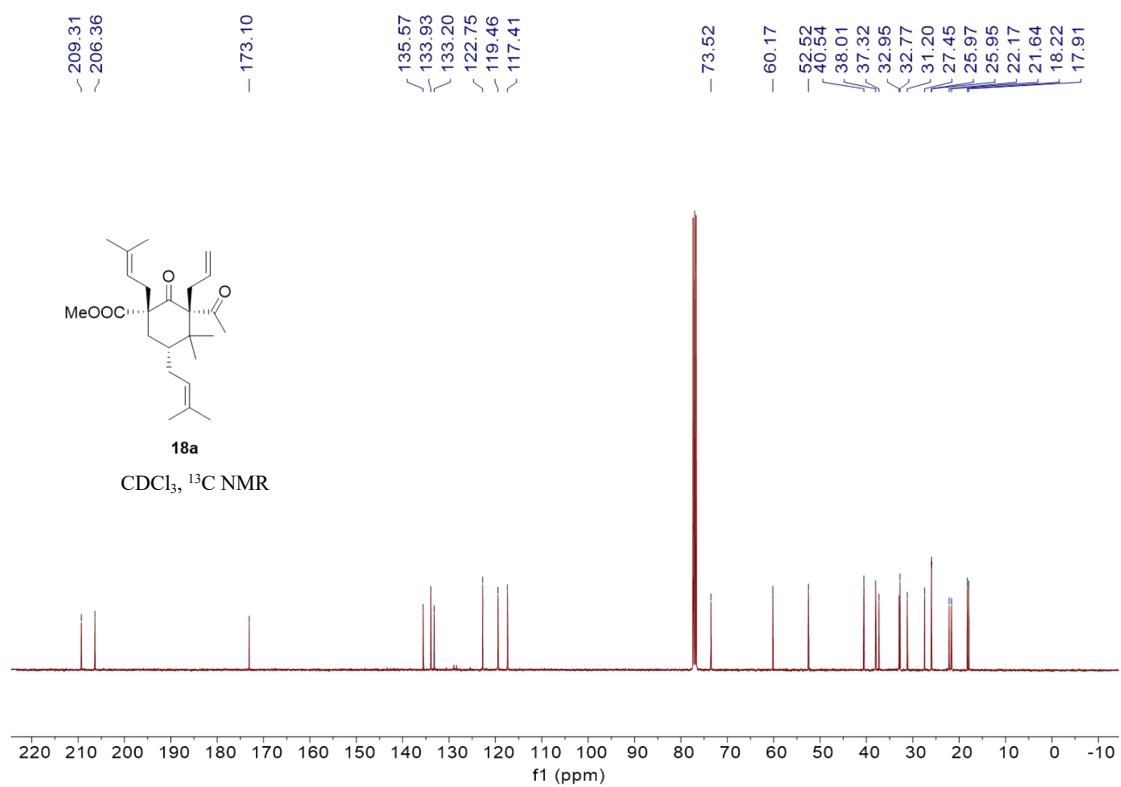

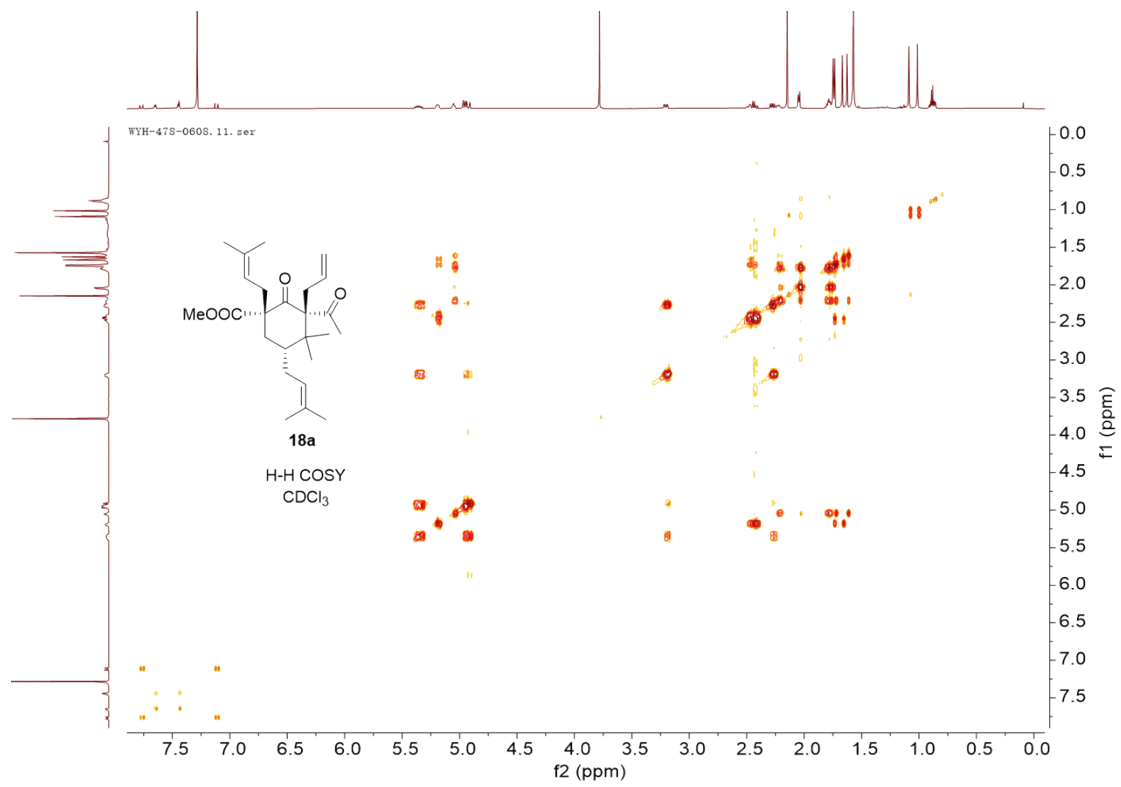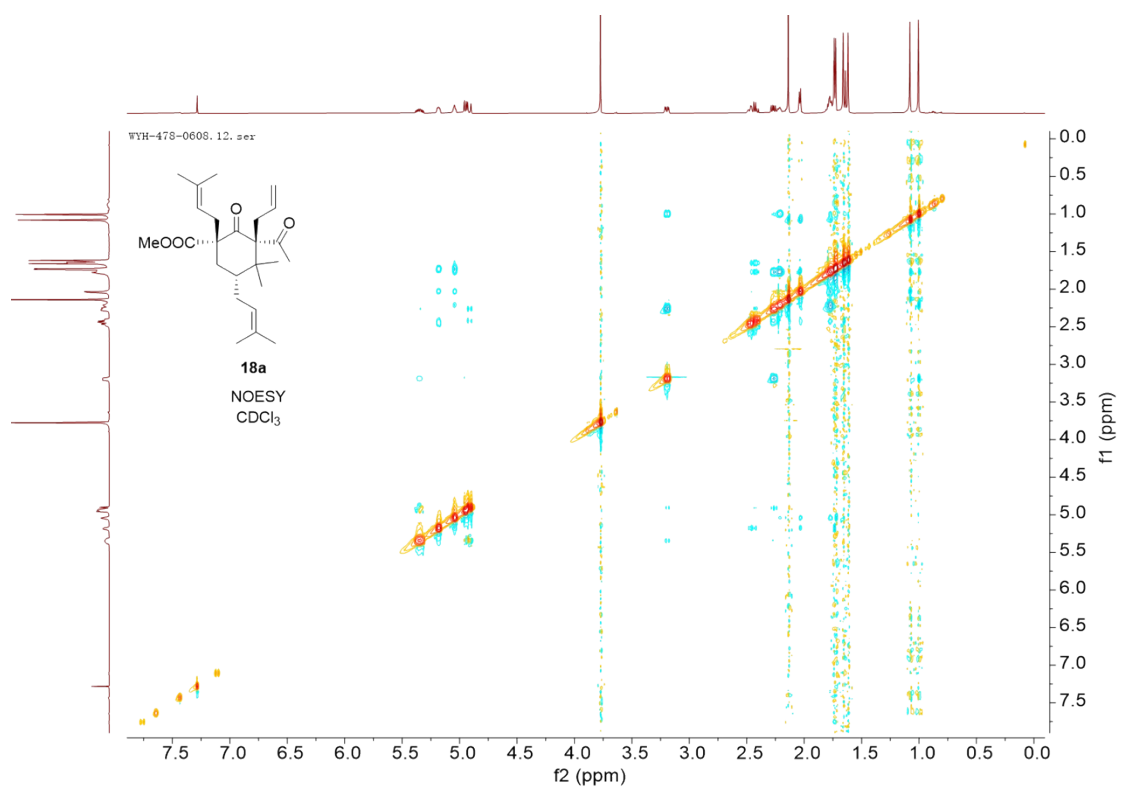



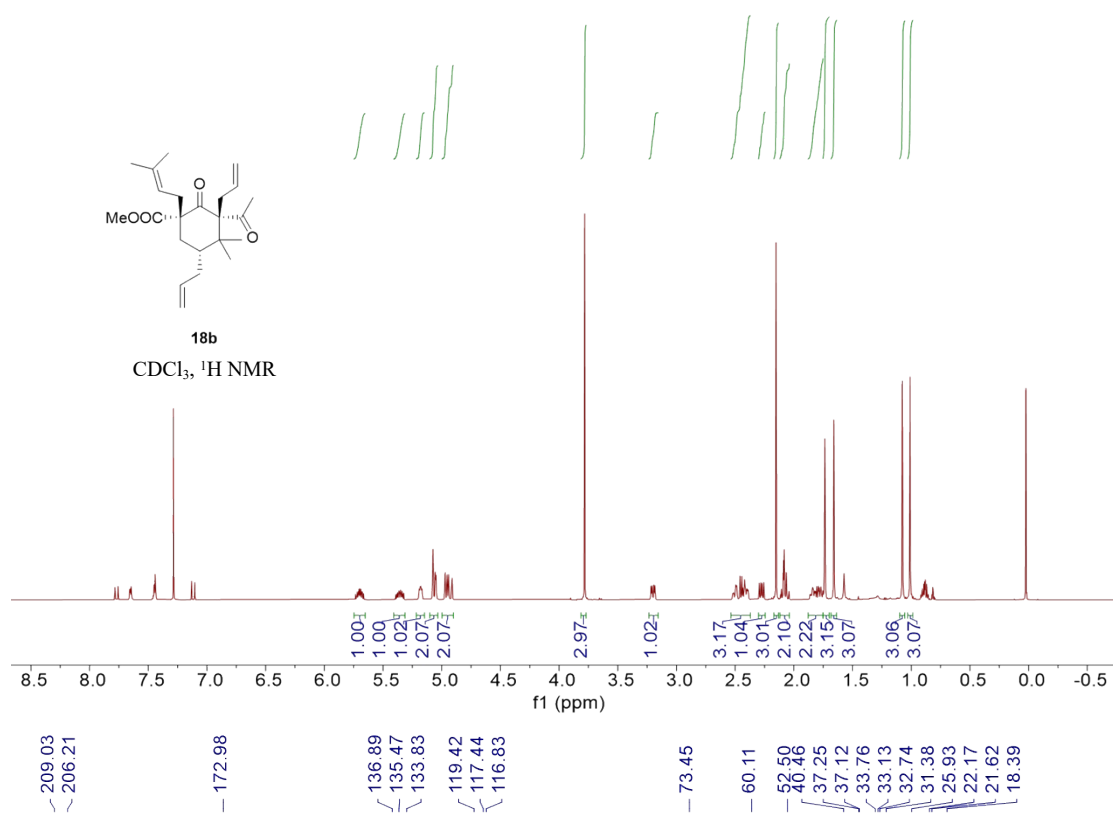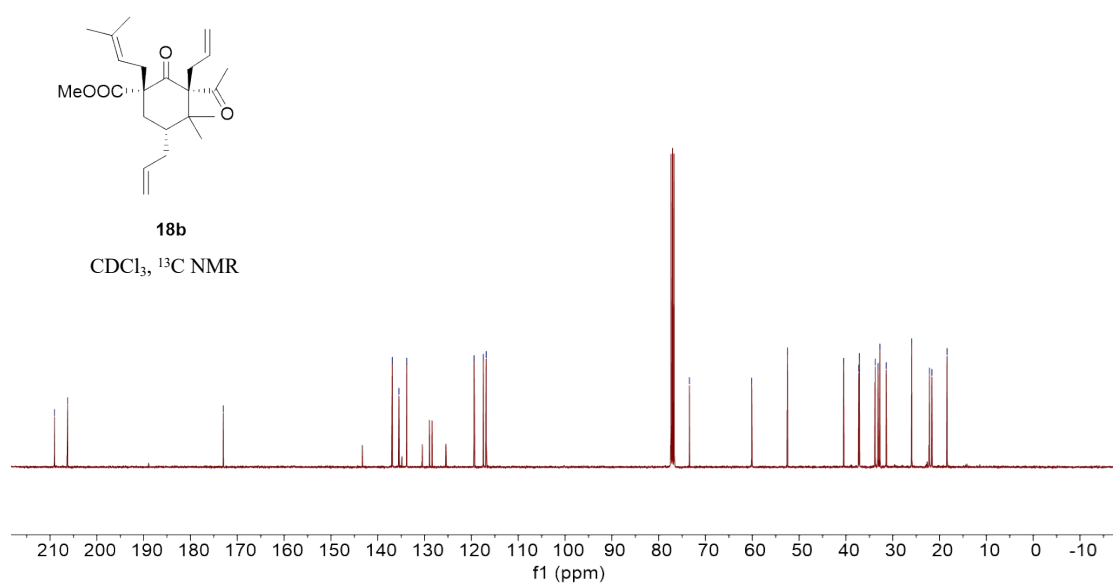

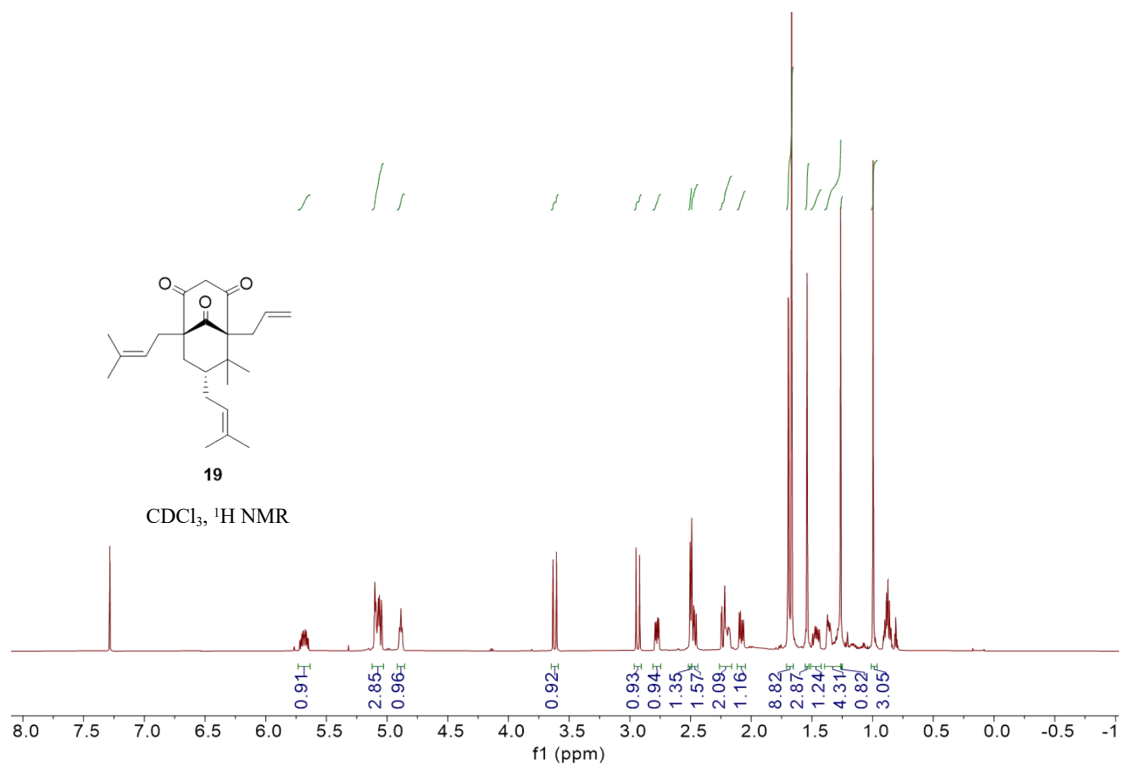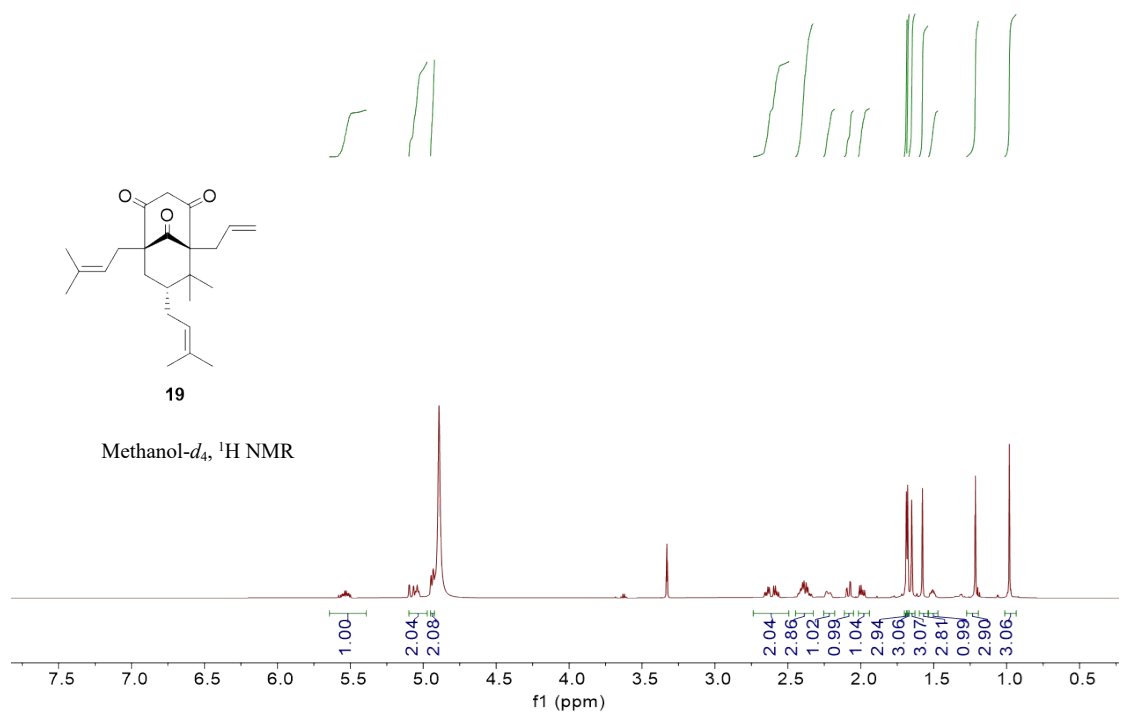

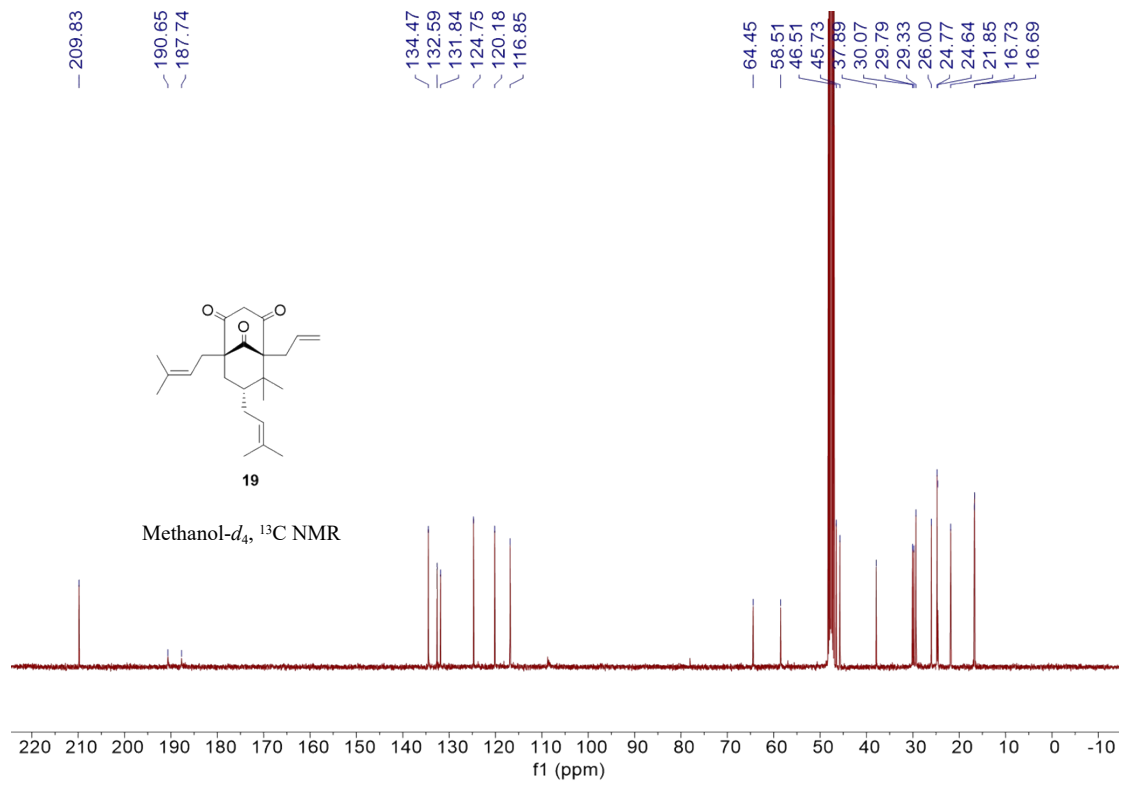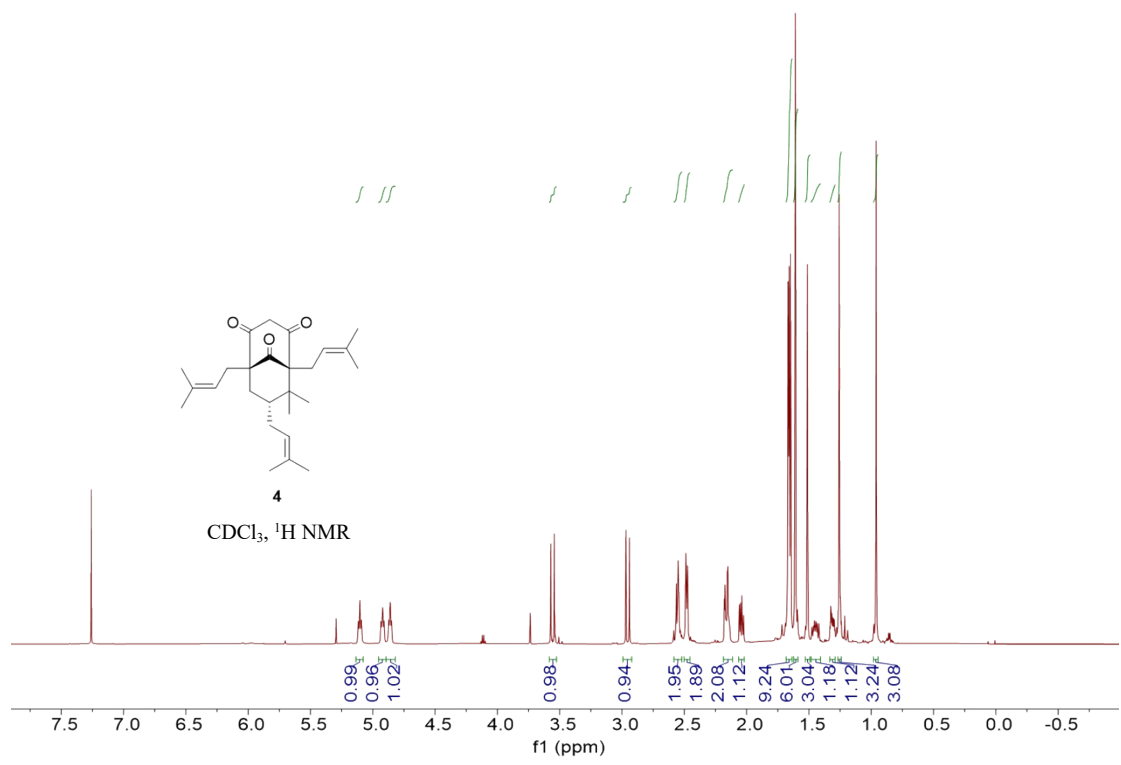

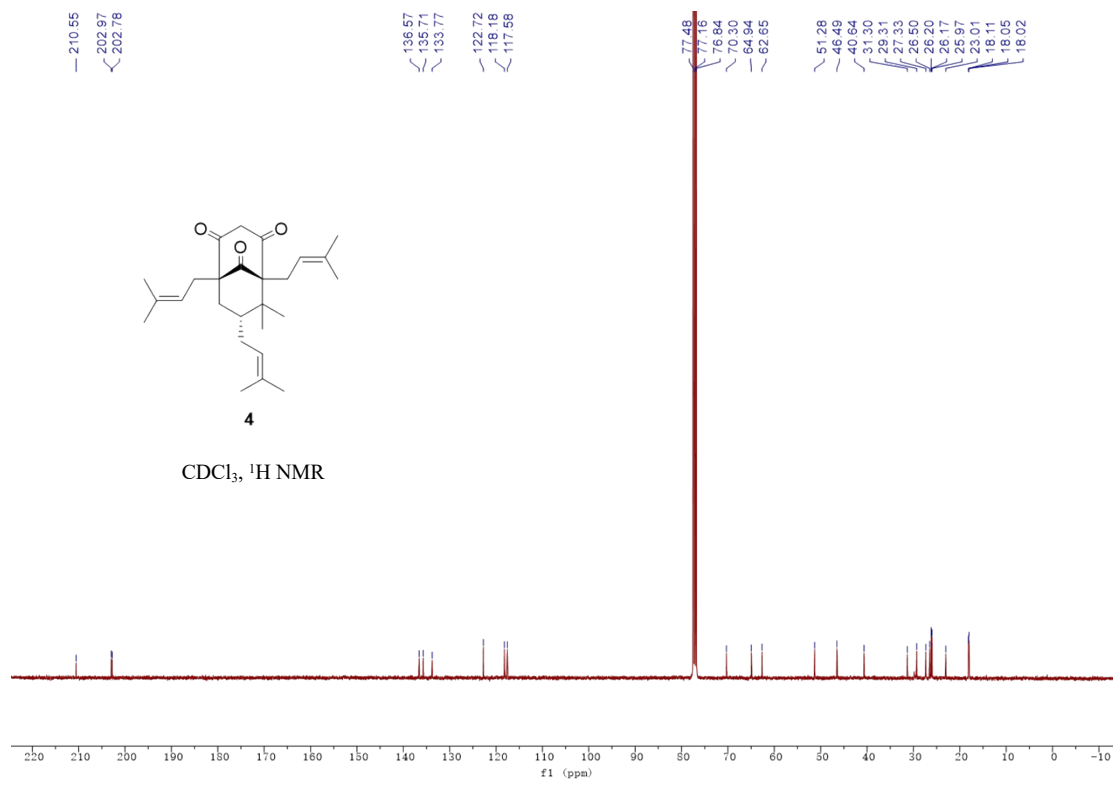

WUH-596.10.1.1z

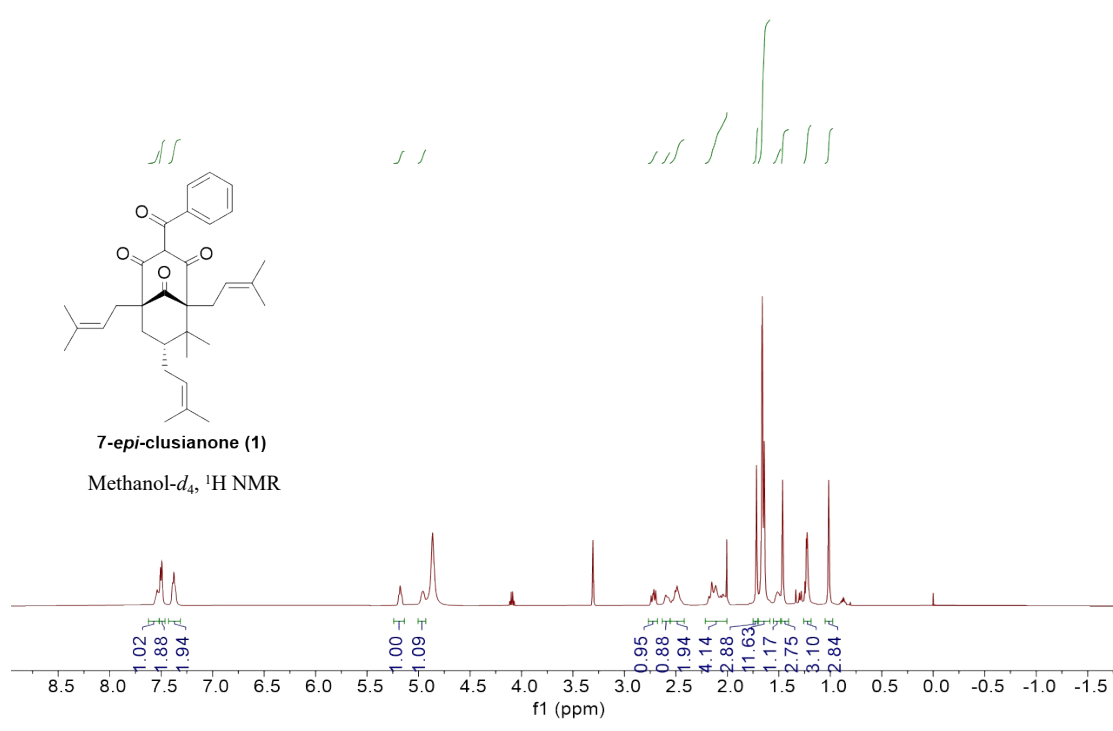

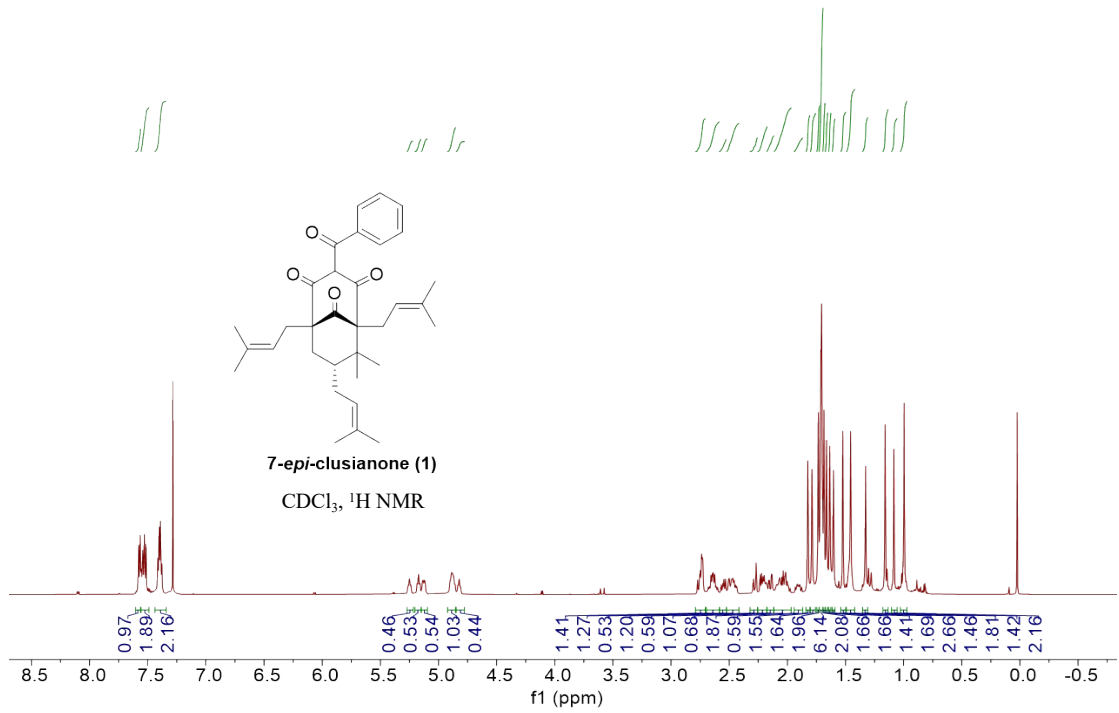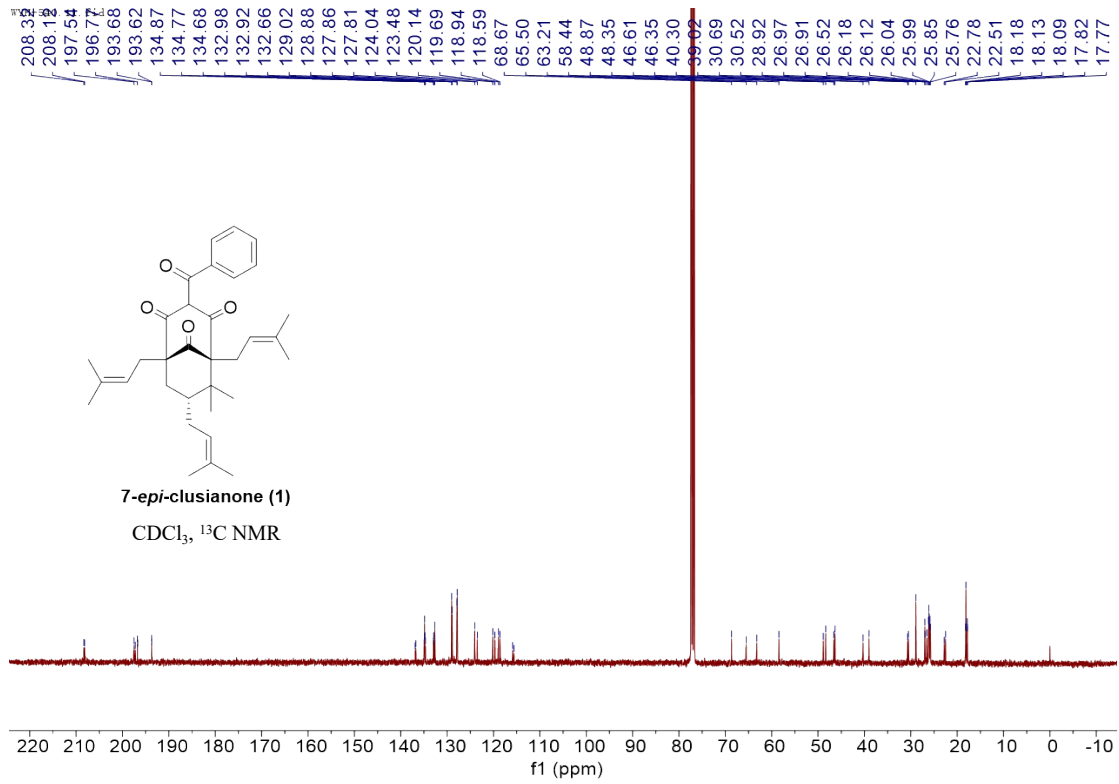

WYH-555.1.fid

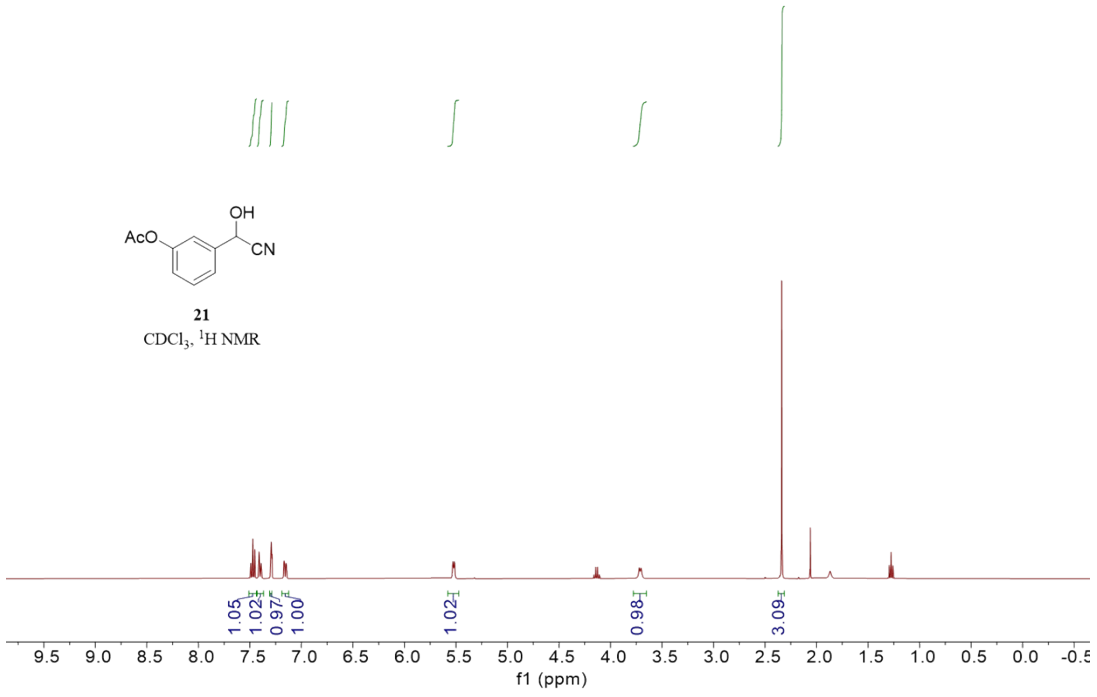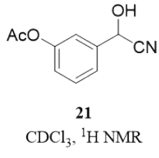

WYH-555.11.fid

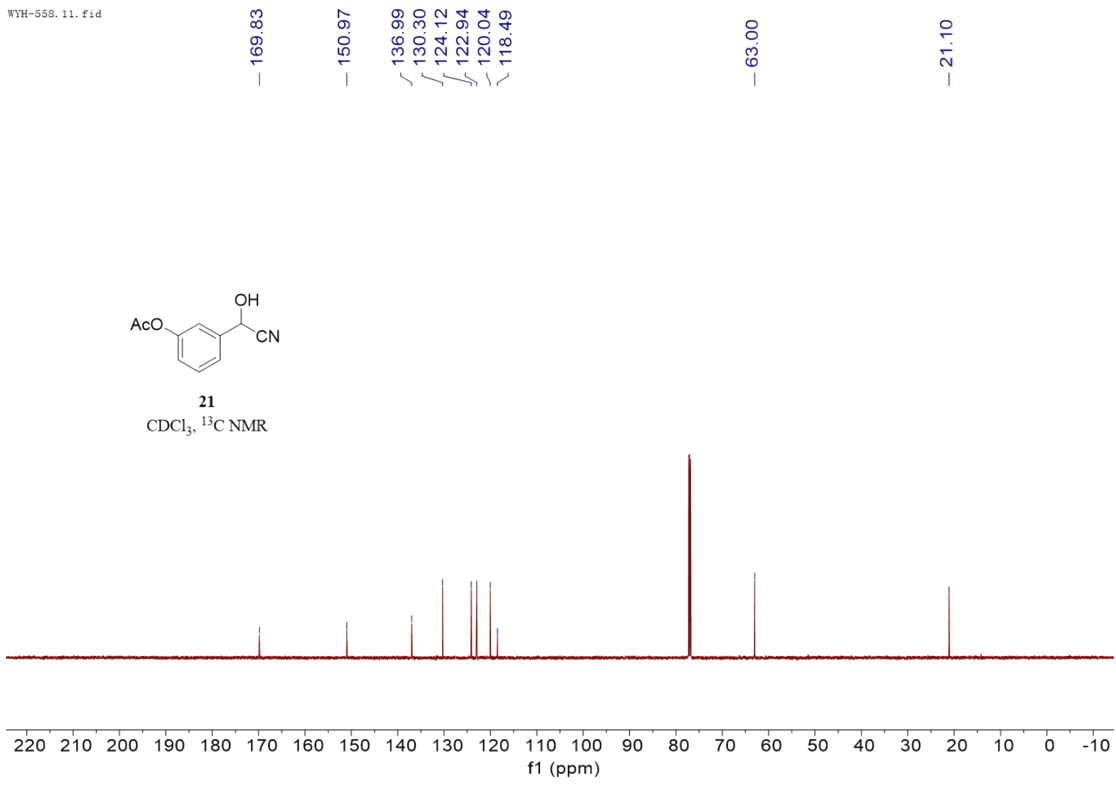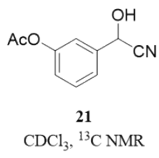

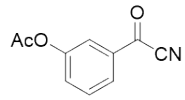

**22**

CDCl<sub>3</sub>, <sup>1</sup>H NMR

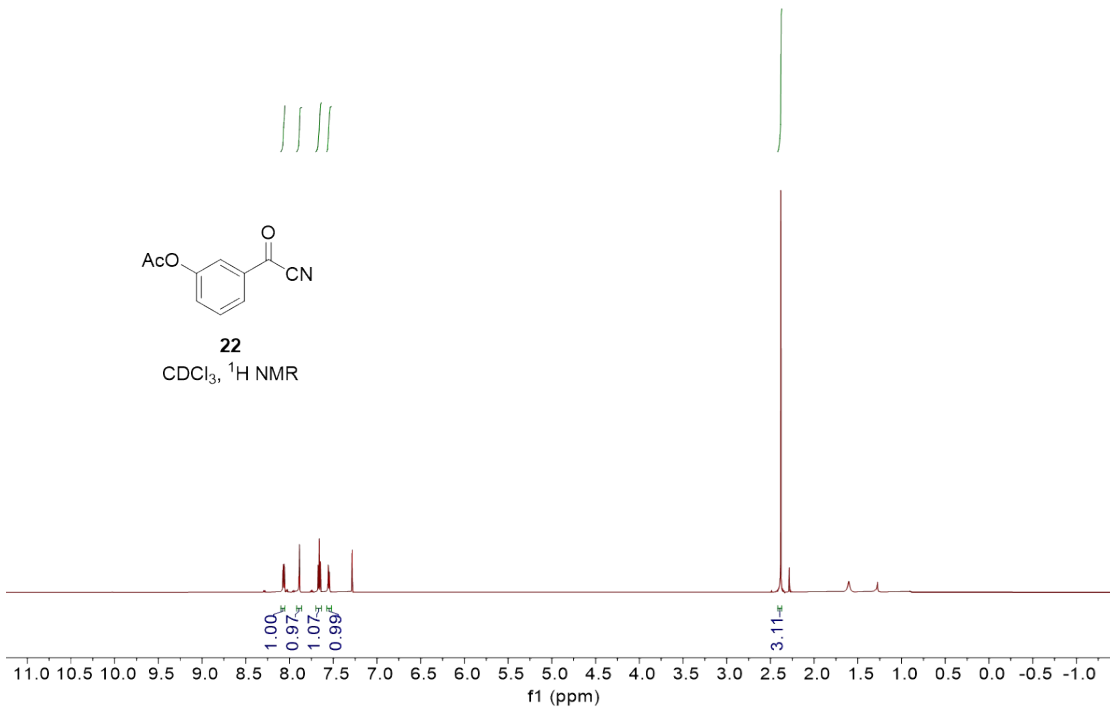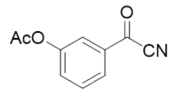

**22**

CDCl<sub>3</sub>, <sup>13</sup>C NMR

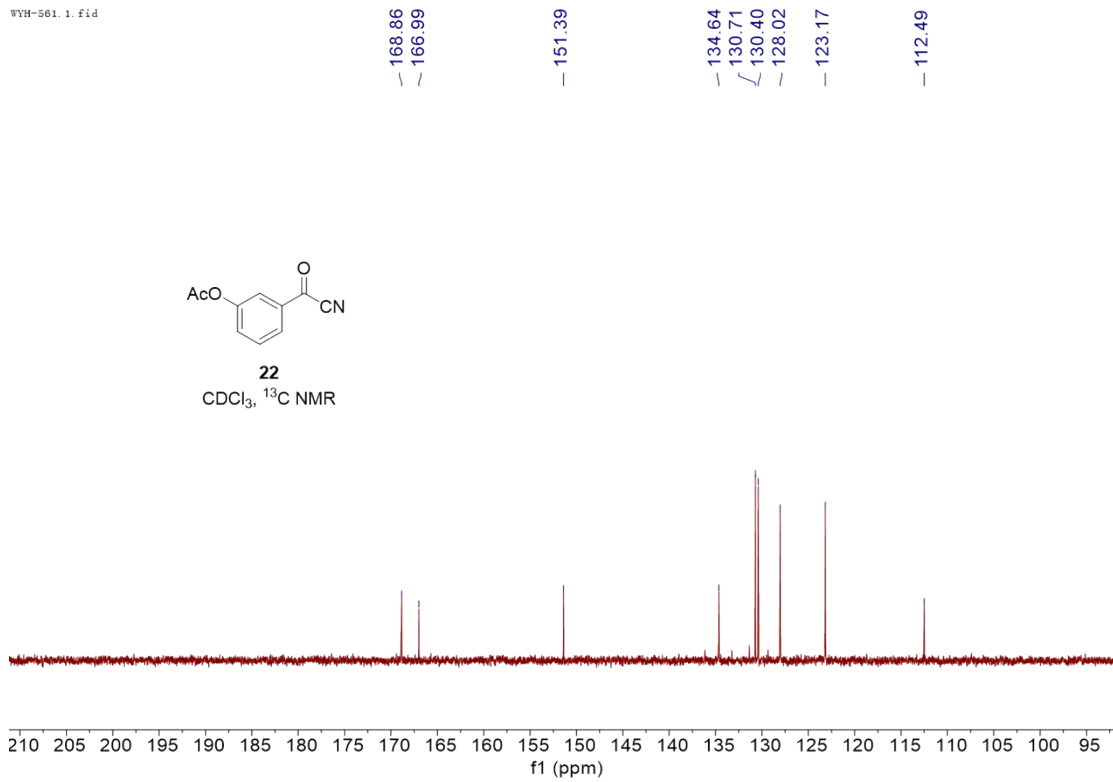

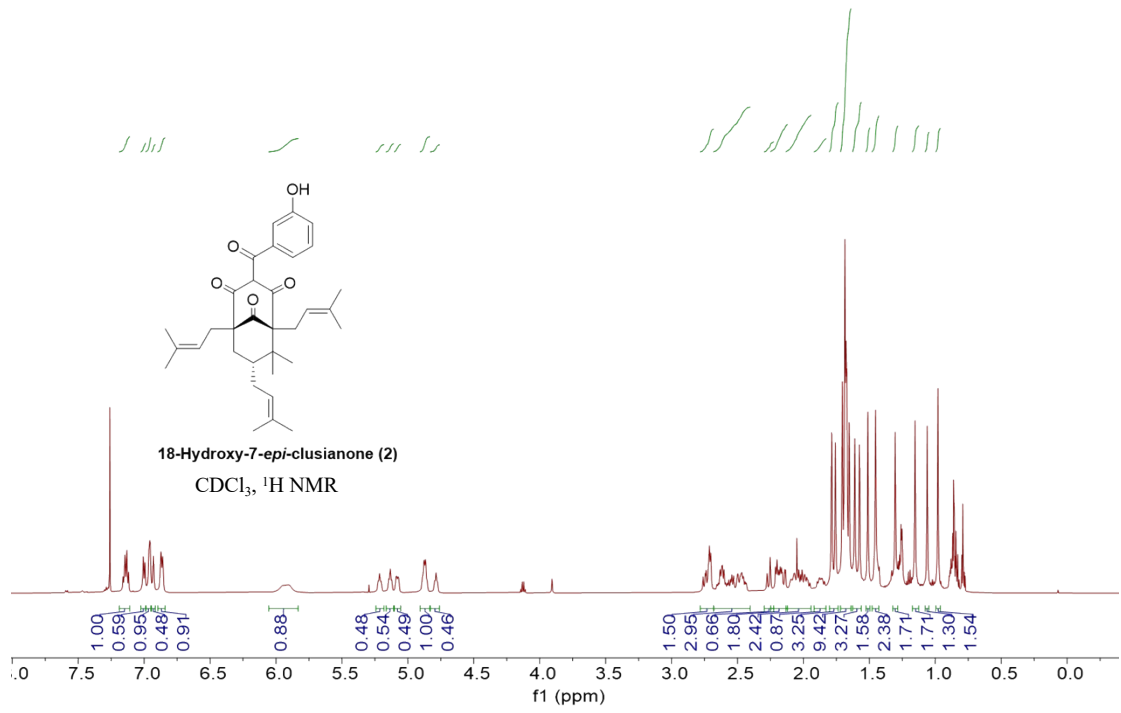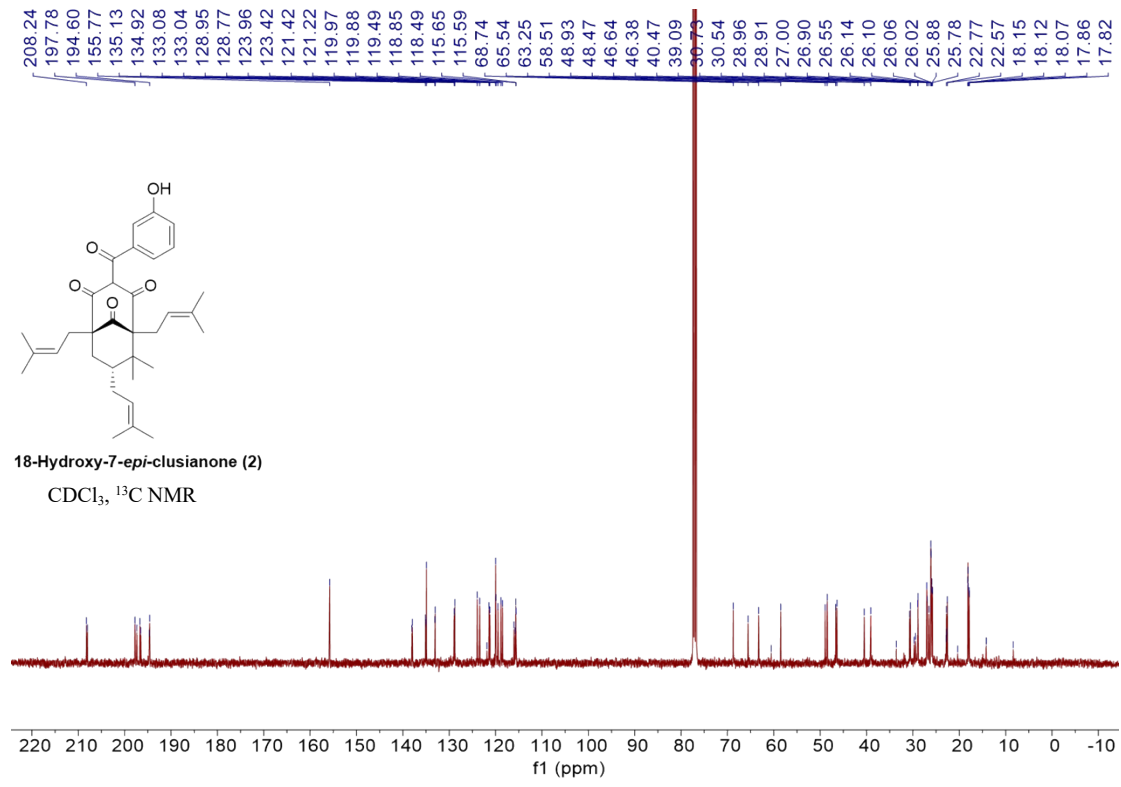



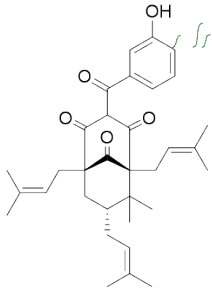

18-Hydroxy-7-epi-clusianone (2)

Methanol-*d*<sub>4</sub>, <sup>1</sup>H NMR

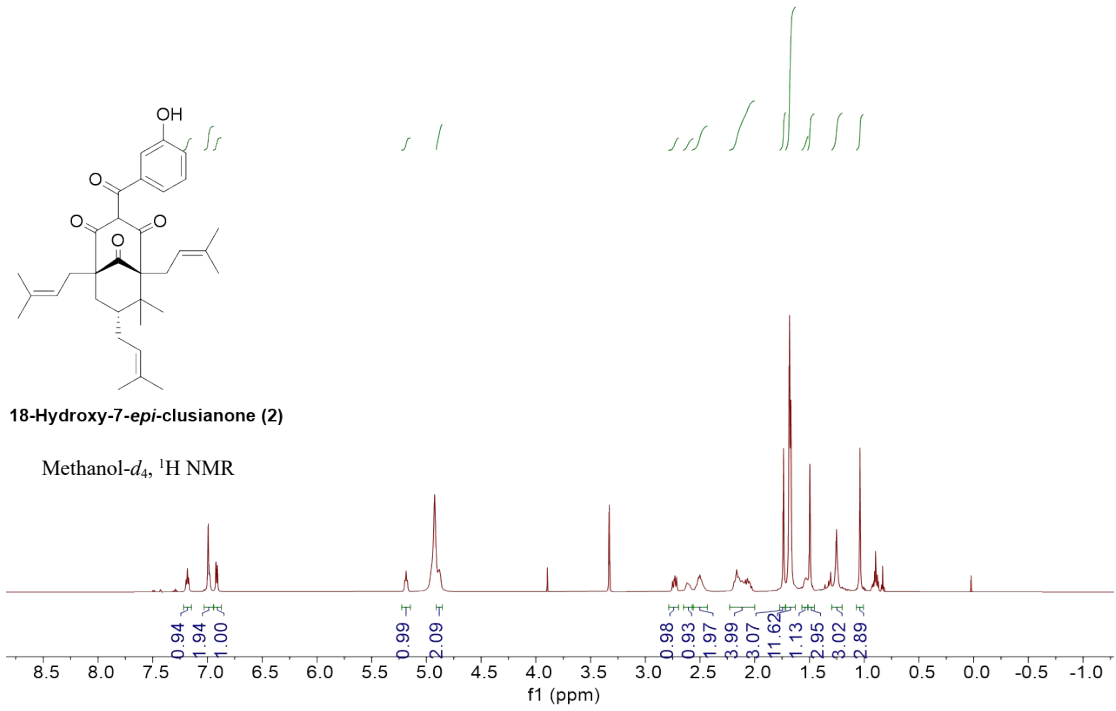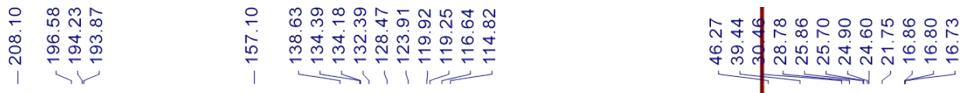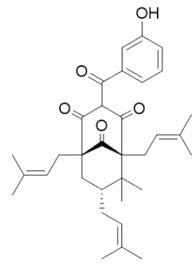

18-Hydroxy-7-epi-clusianone (2)

Methanol-*d*<sub>4</sub>, <sup>13</sup>C NMR

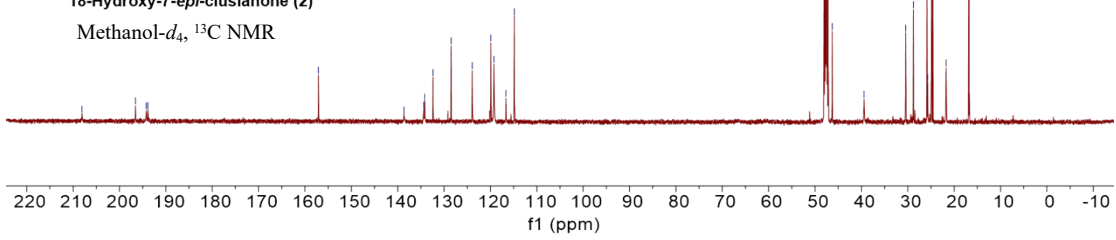

Supplement: d3ob01840g1.pdf [file d3ob01840g1.pdf]
